# Supplementary material for: Sorption and desorption of per- and polyfluoroalkyl substances (PFASs) on unmodified iron oxide and silica clay minerals
Source: Royal Society of Chemistry journal article supplement (doi:10.1039/d5em00847f), 2025-12-16
Supplement: d5em00847f1.pdf [file d5em00847f1.pdf]

**Electronic Supplementary Information for:**

**TITLE:** Sorption and desorption of per- and polyfluoroalkyl substances (PFASs) on unmodified iron oxide and silica clay minerals

**AUTHORS:** Susannah Powell<sup>a</sup>, Hongyi Ban<sup>a,c</sup>, Yi Sang<sup>a</sup>, Daewon Kim<sup>b</sup>, Phillip J. Milner<sup>b</sup>, Matthew Reid<sup>a</sup>, Damian E. Helbling<sup>a,\*</sup>

**AFFILIATIONS:**

<sup>a</sup> School of Civil and Environmental Engineering, Cornell University, Ithaca, NY, 14853, USA

<sup>b</sup> Department of Chemistry and Chemical Biology, Cornell University, Ithaca, NY, 14853, USA

<sup>c</sup> Department of Chemical and Environmental Engineering, Yale University, New Haven, CT 06511 United States

\* Corresponding author: Damian E. Helbling, School of Civil and Environmental Engineering, Cornell University, 220 Hollister Hall, Ithaca, NY, 14853, USA. Email: damian.helbling@cornell.edu. Tel: +1 607 255 5146. Fax: +1 607 255 9004.

## TABLE OF CONTENTS

|                                    |     |
|------------------------------------|-----|
| Materials and methods .....        | S5  |
| Chemicals and reagents.....        | S5  |
| Sorbent materials .....            | S10 |
| Batch experiments.....             | S11 |
| Batch kinetic experiments.....     | S11 |
| Batch isotherm experiments .....   | S13 |
| Batch desorption experiments ..... | S17 |
| Analytical method.....             | S20 |
| Results and discussion .....       | S28 |
| Quality Control for PFAS Data..... | S28 |
| Mineral characterization .....     | S30 |
| Batch kinetic experiments .....    | S32 |
| Batch isotherm experiments .....   | S33 |
| References .....                   | S37 |

## LIST OF FIGURES

**Figure S1.** Zeta-potential (mV) as a function of pH (approx. 4 - 8.3) for ferrihydrite (blue), goethite (red), kaolinite (green), and montmorillonite (purple). The vertical dashed lines on the right represent the range of zeta-potential for each mineral. Error bars are the standard deviation of triplicate measurements. .... 31

## LIST OF TABLES

|                                                                                                                                                                                                                                                                                              |     |
|----------------------------------------------------------------------------------------------------------------------------------------------------------------------------------------------------------------------------------------------------------------------------------------------|-----|
| <b>Table S1.</b> Details on suppliers, product numbers, solvents, and stock solution concentrations for all per- and polyfluoroalkyl substances (PFAS) and isotope-labelled internal standards (ILISs) used for this study. Supplier is Wellington Laboratories unless otherwise noted. .... | S5  |
| <b>Table S2.</b> A summary of all other chemicals and solvents used in this study.....                                                                                                                                                                                                       | S9  |
| <b>Table S3.</b> Details on the chemical composition and physical morphology of each of the four minerals. Average values of the Brunauer-Emmett-Teller (BET) surface area, pore diameter, and pore volume for each of the four minerals are collected from the literature as noted. ....    | S10 |
| <b>Table S4.</b> Analytical information of all PFASs and their assigned ILISs. ....                                                                                                                                                                                                          | S22 |
| <b>Table S5.</b> The mobile phase gradient program for LC-MS analysis. ....                                                                                                                                                                                                                  | S27 |
| <b>Table S6.</b> Summary of PFASs that pass our QC criteria for each type of batch experiment (X = pass). ....                                                                                                                                                                               | S29 |
| <b>Table S7.</b> Zeta-potential for each mineral at varying pH levels.....                                                                                                                                                                                                                   | S30 |
| <b>Table S8.</b> Equilibrium sorption time for each PFAS on each mineral. ....                                                                                                                                                                                                               | S32 |
| <b>Table S9.</b> log $K_d$ values reported as average $\pm$ standard deviation for each PFAS on ferrihydrite. ....                                                                                                                                                                           | S33 |
| <b>Table S10.</b> log $K_d$ values reported as average $\pm$ standard deviation for each PFAS on goethite. ....                                                                                                                                                                              | S34 |
| <b>Table S11.</b> log $K_d$ values reported as average $\pm$ standard deviation for each PFAS on montmorillonite. ....                                                                                                                                                                       | S35 |
| <b>Table S12.</b> log $K_d$ values reported as average $\pm$ standard deviation for each PFAS on kaolinite. ....                                                                                                                                                                             | S36 |

## Materials and methods

### Chemicals and reagents

**Table S1.** Details on suppliers, product numbers, solvents, and stock solution concentrations for all per- and polyfluoroalkyl substances (PFAS) and isotope-labelled internal standards (ILISs) used for this study. Supplier is Wellington Laboratories unless otherwise noted.

| Product Name | Name                         | Acronym | Molecular Formula                                | Stock Concentration  | Solvent <sup>1</sup>          | Stock Solution |
|--------------|------------------------------|---------|--------------------------------------------------|----------------------|-------------------------------|----------------|
| PFC-MXA      | Perfluorobutanoic acid       | PFBA    | C <sub>4</sub> HF <sub>7</sub> O <sub>2</sub>    | 2 mg L <sup>-1</sup> | MeOH: (H <sub>2</sub> O < 1%) | PSS#1          |
| PFC-MXA      | Perfluoropentanoic acid      | PFPeA   | C <sub>5</sub> HF <sub>9</sub> O <sub>2</sub>    | 2 mg L <sup>-1</sup> | MeOH: (H <sub>2</sub> O < 1%) | PSS#1          |
| PFC-MXA      | Perfluorohexanoic acid       | PFHxA   | C <sub>6</sub> HF <sub>11</sub> O <sub>2</sub>   | 2 mg L <sup>-1</sup> | MeOH: (H <sub>2</sub> O < 1%) | PSS#1          |
| PFC-MXA      | Perfluoroheptanoic acid      | PFHpA   | C <sub>7</sub> HF <sub>13</sub> O <sub>2</sub>   | 2 mg L <sup>-1</sup> | MeOH: (H <sub>2</sub> O < 1%) | PSS#1          |
| PFC-MXA      | Perfluorooctanoic acid       | PFOA    | C <sub>8</sub> HF <sub>15</sub> O <sub>2</sub>   | 2 mg L <sup>-1</sup> | MeOH: (H <sub>2</sub> O < 1%) | PSS#1          |
| PFC-MXA      | Perfluorononanoic acid       | PFNA    | C <sub>9</sub> HF <sub>17</sub> O <sub>2</sub>   | 2 mg L <sup>-1</sup> | MeOH: (H <sub>2</sub> O < 1%) | PSS#1          |
| PFC-MXA      | Perfluorodecanoic acid       | PFDA    | C <sub>10</sub> H <sub>19</sub> O <sub>2</sub>   | 2 mg L <sup>-1</sup> | MeOH: (H <sub>2</sub> O < 1%) | PSS#1          |
| PFC-MXA      | Perfluoroundecanoic acid     | PFUnA   | C <sub>11</sub> HF <sub>21</sub> O <sub>2</sub>  | 2 mg L <sup>-1</sup> | MeOH: (H <sub>2</sub> O < 1%) | PSS#1          |
| PFC-MXA      | Perfluorododecanoic acid     | PFDoA   | C <sub>12</sub> H <sub>23</sub> O <sub>2</sub>   | 2 mg L <sup>-1</sup> | MeOH: (H <sub>2</sub> O < 1%) | PSS#1          |
| PFC-MXA      | Perfluorotridecanoic acid    | PFTTrDA | C <sub>13</sub> HF <sub>25</sub> O <sub>2</sub>  | 2 mg L <sup>-1</sup> | MeOH: (H <sub>2</sub> O < 1%) | PSS#1          |
| PFC-MXA      | Perfluorotetradecanoic acid  | PFTA    | C <sub>14</sub> HF <sub>27</sub> O <sub>2</sub>  | 2 mg L <sup>-1</sup> | MeOH: (H <sub>2</sub> O < 1%) | PSS#1          |
| PFS-MXA      | Perfluorobutanesulfonic acid | PFBS    | C <sub>4</sub> HF <sub>9</sub> O <sub>3</sub> S  | 2 mg L <sup>-1</sup> | MeOH                          | PSS#1          |
| PFS-MXA      | Perfluorohexanesulfonic acid | PFHxS   | C <sub>6</sub> HF <sub>13</sub> O <sub>3</sub> S | 2 mg L <sup>-1</sup> | MeOH                          | PSS#1          |

| Product Name         | Name                                       | Acronym     | Molecular Formula                                               | Stock Concentration           | Solvent <sup>1</sup>           | Stock Solution |
|----------------------|--------------------------------------------|-------------|-----------------------------------------------------------------|-------------------------------|--------------------------------|----------------|
| PFS-MXA              | Perfluoroheptanesulfonic acid              | PFHpS       | C <sub>7</sub> H <sub>7</sub> F <sub>15</sub> O <sub>3</sub> S  | 2 mg L <sup>-1</sup>          | MeOH                           | PSS#1          |
| PFS-MXA              | Perfluorooctanesulfonic acid               | PFOS        | C <sub>8</sub> H <sub>7</sub> F <sub>17</sub> O <sub>3</sub> S  | 2 mg L <sup>-1</sup>          | MeOH                           | PSS#1          |
| PFS-MXA              | Perfluorodecanesulfonic acid               | PFDS        | C <sub>10</sub> H <sub>7</sub> F <sub>21</sub> O <sub>3</sub> S | 2 mg L <sup>-1</sup>          | MeOH                           | PSS#1          |
| FTA-MXA              | 2-Perfluorohexyl ethanoic acid             | 6:2 FTCA    | C <sub>8</sub> H <sub>3</sub> O <sub>2</sub> F <sub>13</sub>    | 2 mg L <sup>-1</sup>          | IPA: (H <sub>2</sub> O < 0.5%) | PSS#2          |
| FTA-MXA              | 2-Perfluorooctyl ethanoic acid             | 8:2 FTCA    | C <sub>10</sub> H <sub>3</sub> O <sub>2</sub> F <sub>17</sub>   | 2 mg L <sup>-1</sup>          | IPA: (H <sub>2</sub> O < 0.5%) | PSS#2          |
| FTA-MXA              | 2-Perfluorodecyl ethanoic acid             | 10:2 FTCA   | C <sub>12</sub> H <sub>3</sub> O <sub>2</sub> F <sub>21</sub>   | 2 mg L <sup>-1</sup>          | IPA: (H <sub>2</sub> O < 0.5%) | PSS#2          |
| FPrPA                | 3-Perfluoropropyl propanoic acid           | 3:3 FTCA    | C <sub>6</sub> H <sub>5</sub> F <sub>7</sub> O <sub>2</sub>     | 50 +/- 2.5 mg L <sup>-1</sup> | Methanol                       | PSS#2          |
| FPePA                | 3-Perfluoropentyl propanoic acid           | 5:3 FTCA    | C <sub>8</sub> H <sub>5</sub> F <sub>11</sub> O <sub>2</sub>    | 50 +/- 2.5 mg L <sup>-1</sup> | Methanol                       | PSS#2          |
| FPePA                | 3-Perfluoroheptyl propanoic acid           | 7:3 FTCA    | C <sub>10</sub> H <sub>5</sub> F <sub>15</sub> O <sub>2</sub>   | 50 +/- 2.5 mg L <sup>-1</sup> | Methanol                       | PSS#2          |
| FHUEA                | 2H-Perfluoro-2-octenoic acid               | 5:1:2 FTUCA | C <sub>8</sub> H <sub>2</sub> O <sub>2</sub> F <sub>12</sub>    | 50 +/- 2.5 mg L <sup>-1</sup> | Anhydrous IPA                  | PSS#2          |
| FOUEA                | 2H-Perfluoro-2-decenoic acid               | 7:1:2 FTUCA | C <sub>10</sub> H <sub>2</sub> O <sub>2</sub> F <sub>16</sub>   | 50 +/- 2.5 mg L <sup>-1</sup> | Anhydrous IPA                  | PSS#2          |
| FDUEA                | 2H-Perfluoro-2-dodecenoic acid             | 9:1:2 FTUCA | C <sub>12</sub> H <sub>2</sub> O <sub>2</sub> F <sub>20</sub>   | 50 +/- 2.5 mg L <sup>-1</sup> | Anhydrous IPA                  | PSS#2          |
| 4:2 FTS              | 1H,1H,2H,2H-Perfluorohexanesulphonic acid  | 4:2 FTS     | C <sub>6</sub> H <sub>5</sub> F <sub>9</sub> O <sub>3</sub> S   | 50 +/- 2.5 mg L <sup>-1</sup> | MeOH                           | PSS#2          |
| 6:2 FTS <sup>2</sup> | 1H,1H,2H,2H-Perfluorooctanesulphonic acid  | 6:2 FTS     | C <sub>8</sub> H <sub>5</sub> F <sub>13</sub> O <sub>3</sub> S  | 1 g L <sup>-1</sup>           | MeOH                           | PSS#2          |
| 8:2 FTS              | 1H,1H,2H,2H-perfluorodecanesulfonic acid   | 8:2 FTS     | C <sub>10</sub> H <sub>5</sub> F <sub>17</sub> O <sub>3</sub> S | 50 +/- 2.5 mg L <sup>-1</sup> | MeOH                           | PSS#2          |
| Other                | 1H,1H,2H,2H-perfluorododecanesulfonic acid | 10:2 FTS    | C <sub>12</sub> H <sub>4</sub> F <sub>21</sub> SO <sub>3</sub>  | 50 +/- 2.5 mg L <sup>-1</sup> | MeOH                           | PSS#2          |

| Product Name             | Name                                                                       | Acronym                              | Molecular Formula                                                                              | Stock Concentration           | Solvent <sup>1</sup>          | Stock Solution |
|--------------------------|----------------------------------------------------------------------------|--------------------------------------|------------------------------------------------------------------------------------------------|-------------------------------|-------------------------------|----------------|
| FBSA                     | Perfluoro-1-butanefulfonamide                                              | FBSA                                 | C <sub>4</sub> H <sub>2</sub> F <sub>9</sub> NO <sub>2</sub> S                                 | 50 mg L <sup>-1</sup>         | IPA                           | PSS#2          |
| FOSA                     | Perfluoro-1-octanesulfonamide                                              | FOSA                                 | C <sub>8</sub> H <sub>2</sub> F <sub>17</sub> NO <sub>2</sub> S                                | 50 mg L <sup>-1</sup>         | MeOH: (H <sub>2</sub> O < 1%) | PSS#2          |
| Other <sup>3</sup>       | Perfluoro-N-(2- hydroxyethyl)-1butanesulfonamide                           | FBSE                                 | C <sub>6</sub> H <sub>6</sub> F <sub>9</sub> NO <sub>3</sub> S                                 | 300 mg L <sup>-1</sup>        | IPA                           | PSS#2          |
| TRC-N649510 <sup>3</sup> | Perfluoro-N-(2- methoxyethyl)-1butanesulfonamide                           | MeFBSE                               | C <sub>7</sub> H <sub>8</sub> F <sub>9</sub> NO <sub>3</sub> S                                 | 300 mg L <sup>-1</sup>        | IPA                           | PSS#2          |
| N-MeFOSAA                | N-methylperfluoro-1octanesulfonamidoacetic acid                            | N-MeFOSAA                            | C <sub>11</sub> H <sub>6</sub> F <sub>17</sub> NO <sub>4</sub> S                               | 50 +/- 2.5 mg L <sup>-1</sup> | MeOH: (H <sub>2</sub> O < 1%) | PSS#2          |
| N-EtFOSAA                | N-ethylperfluoro-1octanesulfonamidoacetic acid                             | N-EtFOSAA                            | C <sub>12</sub> H <sub>8</sub> F <sub>17</sub> NO <sub>4</sub> S                               | 50 +/- 2.5 mg L <sup>-1</sup> | MeOH: (H <sub>2</sub> O < 1%) | PSS#2          |
| 5:3FTB                   | Undecafluorooctyl)dimethylammonio]acetate                                  | 5:3 FTB                              | C <sub>12</sub> H <sub>14</sub> F <sub>11</sub> NO <sub>2</sub>                                | 50 +/- 2.5 mg L <sup>-1</sup> | Methanol                      | PSS#2          |
| 5:1:2FTB                 | Dodecafluorooctyl)dimethylammonio]acetate                                  | 5:1:2 FTB                            | C <sub>12</sub> H <sub>13</sub> F <sub>12</sub> NO <sub>2</sub>                                | 50 +/- 2.5 mg L <sup>-1</sup> | Methanol                      | PSS#2          |
| N-AmPr-FHxSA             | (3-dimethylaminopropan-1-yl)perfluoro-1-hexane-sulfonamide                 | AmPr-FHxSA                           | C <sub>11</sub> H <sub>13</sub> F <sub>13</sub> N <sub>2</sub> O <sub>2</sub> S                | 50 +/- 2.5 mg L <sup>-1</sup> | Methanol                      | PSS#3          |
| N-TAmPFHxSA              | [3-perfluoro-1-hexanesulfonamido)propan-1-yl]-N-trimethylammonium          | TAmPr-FHxSA                          | C <sub>12</sub> H <sub>15</sub> F <sub>13</sub> N <sub>2</sub> O <sub>2</sub> S                | 50 +/- 2.5 mg L <sup>-1</sup> | Methanol                      | PSS#3          |
| N-CMAmP6:2FOSA           | 6:2 fluorotelomer sulfonamide alkylbetanine                                | 6:2 FTAB                             | C <sub>15</sub> H <sub>19</sub> F <sub>13</sub> N <sub>2</sub> O <sub>4</sub> S                | 50 +/- 2.5 mg L <sup>-1</sup> | Methanol                      | PSS#3          |
| MPFAC-MXA                | Sodium perfluoro-1hexane[ <sup>18</sup> O <sub>2</sub> ]sulfonate          | <sup>18</sup> O <sub>2</sub> - PFHxS | C <sub>6</sub> H <sub>2</sub> F <sub>13</sub> [ <sup>18</sup> O] <sub>2</sub> O <sub>2</sub> S | 2 mg L <sup>-1</sup>          | MeOH: (H <sub>2</sub> O < 1%) | ILIS           |
| MPFAC-MXA                | Sodium perfluoro-1-[1,2,3,4- <sup>13</sup> C <sub>4</sub> ]octanesulfonate | <sup>13</sup> C <sub>4</sub> - PFOS  | [ <sup>13</sup> C] <sub>4</sub> C <sub>4</sub> H <sub>2</sub> F <sub>17</sub> O <sub>3</sub> S | 2 mg L <sup>-1</sup>          | MeOH: (H <sub>2</sub> O < 1%) | ILIS           |
| MPFAC-MXA                | Perfluoro-n-[ <sup>13</sup> C <sub>4</sub> ]butanoic acid                  | <sup>13</sup> C <sub>4</sub> - PFBA  | [ <sup>13</sup> C] <sub>4</sub> H <sub>2</sub> F <sub>7</sub> O <sub>2</sub>                   | 2 mg L <sup>-1</sup>          | MeOH: (H <sub>2</sub> O < 1%) | ILIS           |
| MPFAC-MXA                | Perfluoro-n-[1,2- <sup>13</sup> C <sub>2</sub> ]hexanoic acid              | <sup>13</sup> C <sub>2</sub> - PFHxA | [ <sup>13</sup> C] <sub>2</sub> C <sub>4</sub> H <sub>2</sub> F <sub>11</sub> O <sub>2</sub>   | 2 mg L <sup>-1</sup>          | MeOH: (H <sub>2</sub> O < 1%) | ILIS           |

| Product Name | Name                                                                | Acronym                              | Molecular Formula                                                  | Stock Concentration  | Solvent <sup>1</sup>          | Stock Solution |
|--------------|---------------------------------------------------------------------|--------------------------------------|--------------------------------------------------------------------|----------------------|-------------------------------|----------------|
| MPFAC-MXA    | Perfluoro-n-[1,2,3,4- <sup>13</sup> C <sub>4</sub> ]octanoic acid   | <sup>13</sup> C <sub>4</sub> - PFOA  | [13]C <sub>4</sub> C <sub>4</sub> HF <sub>15</sub> O <sub>2</sub>  | 2 mg L <sup>-1</sup> | MeOH: (H <sub>2</sub> O < 1%) | ILIS           |
| MPFAC-MXA    | Perfluoro-n-[1,2,3,4,5- <sup>13</sup> C <sub>5</sub> ]nonanoic acid | <sup>13</sup> C <sub>5</sub> - PFNA  | [13]C <sub>5</sub> C <sub>4</sub> HF <sub>17</sub> O <sub>2</sub>  | 2 mg L <sup>-1</sup> | MeOH: (H <sub>2</sub> O < 1%) | ILIS           |
| MPFAC-MXA    | Perfluoro-n-[1,2- <sup>13</sup> C <sub>2</sub> ]decanoic acid       | <sup>13</sup> C <sub>2</sub> - PFDA  | [13]C <sub>2</sub> C <sub>8</sub> HF <sub>19</sub> O <sub>2</sub>  | 2 mg L <sup>-1</sup> | MeOH: (H <sub>2</sub> O < 1%) | ILIS           |
| MPFAC-MXA    | Perfluoro-n-[1,2- <sup>13</sup> C <sub>2</sub> ]undecanoic acid     | <sup>13</sup> C <sub>2</sub> - PFUnA | [13]C <sub>2</sub> C <sub>9</sub> HF <sub>21</sub> O <sub>2</sub>  | 2 mg L <sup>-1</sup> | MeOH: (H <sub>2</sub> O < 1%) | ILIS           |
| MPFAC-MXA    | Perfluoro-n-[1,2- <sup>13</sup> C <sub>2</sub> ]dodecanoic acid     | <sup>13</sup> C <sub>2</sub> - PFDoA | [13]C <sub>2</sub> C <sub>10</sub> HF <sub>23</sub> O <sub>2</sub> | 2 mg L <sup>-1</sup> | MeOH: (H <sub>2</sub> O < 1%) | ILIS           |

<sup>1</sup>H<sub>2</sub>O = water, MeOH = methanol, IPA = Isopropanol; <sup>2</sup>Supplier is Santa Cruz Biotech; <sup>3</sup>Supplier is Toronto Research Chemicals.



**Table S2.** A summary of all other chemicals and solvents used in this study.

| Substance                                | CAS No.    | Supplier          | Purity      |
|------------------------------------------|------------|-------------------|-------------|
| Methanol (OmniSolv®)                     | 67-56-1    | Sigma-Aldirch     | LC-MS Grade |
| Water (OmniSolv®)                        | 7732-18-5  | Sigma-Aldirch     | LC-MS Grade |
| Acetone                                  | 67-64-1    | Sigma-Aldirch     | HPLC Grade  |
| Ammonium Acetate (for molecular biology) | 631-61-8   | Sigma-Aldirch     | ≥ 98%       |
| Sodium Nitrate                           | 7631-99-4  | Fisher Scientific | > 99%       |
| Magnesium Sulfate Heptahydrate (ACS)     | 10034-99-8 | Alfa Aesar        | 98-102%     |
| Barium Chloride Dihydrate                | 10326-27-9 | Beantown Chemical | 99%         |
| Barium Hydroxide                         | 12230-71-6 | Fisher Scientific | ≥ 98.0 %    |
| Nitric Acid (Trace Metal Grade)          | 7697-37-2  | Fisher Scientific | 67-70%      |
| Sodium Hydroxide                         | 1310-73-2  | VWR International | 97%         |
| Hydrochloric Acid (ACS Grade)            | 7647-01-0  | VWR International | 36.5-38%    |

## Sorbent materials

**Table S3.** Details on the chemical composition and physical morphology of each of the four minerals.

| Mineral         | Type       | Molecular Formula                                                      | Molecular Weight | CAS No.    | BET SSA ( $\text{m}^2 \text{g}^{-1}$ ) | $d_{\text{particle}}$ ( $\mu\text{m}$ ) | $d_{\text{pore}}$ (average pore diameter (nm)) | Pore volume ( $\text{mm}^3 \text{g}^{-1}$ ) | Source                   |
|-----------------|------------|------------------------------------------------------------------------|------------------|------------|----------------------------------------|-----------------------------------------|------------------------------------------------|---------------------------------------------|--------------------------|
| Ferrihydrite    | Iron-oxide | $\text{Fe}_{10}\text{O}_{14}(\text{OH})_2 \cdot 3.8\text{H}_2\text{O}$ | 884.98           | NA         | 360                                    | 10-38                                   | 3.3                                            | 220                                         | Synthesized in lab       |
| Goethite        | Iron-oxide | $\text{FeHO}_2$                                                        | 88.85            | 20344-49-4 | 10                                     | 10-38                                   | 35                                             | 26                                          | Santa Cruz Biotechnology |
| Kaolinite       | clay       | $\text{Al}_2\text{O}_3 \cdot 2\text{SiO}_2 \cdot 2\text{H}_2\text{O}$  | 258.16           | 1318-74-7  | 6                                      | 10-38                                   | 47                                             | 16                                          | Sigma-Aldrich            |
| Montmorillonite | clay       | $\text{Al}_2\text{H}_2\text{O}_{12}\text{Si}_4$                        | 360.31           | 1318-93-0  | 264                                    | 10-38                                   | 4.6                                            | 370                                         | Thermo Scientific        |

## Batch experiments

### *Batch kinetic experiments*

Stock solutions of each of the four minerals were prepared in 20 mL amber glass vials at concentrations of  $5 \text{ g L}^{-1}$  for ferrihydrite and  $500 \text{ g L}^{-1}$  for goethite, kaolinite, and montmorillonite, mixed for 30 minutes on a magnetic stirrer, ultra-sonicated for 10 minutes, and spiked at 0.5 mL into a 15 mL PP centrifuge tube containing 10 mL of 10 mmol  $\text{NaNO}_3$ . Final concentrations of each mineral in the experiments were  $238 \text{ mg L}^{-1}$  for ferrihydrite and  $23.8 \text{ g L}^{-1}$  for goethite, kaolinite, and montmorillonite. No pH adjustments were made in this experiment and pH levels were measured at the time of sampling to be approximately 4, 5, 6.3, and 8.3 for montmorillonite, ferrihydrite, kaolinite, and goethite, respectively. Next, 20  $\mu\text{L}$  of one of the stock solutions (separate batch experiments were completed for PSS#1, PSS#2, and PSS#3) was spiked into each reactor tube to generate an initial concentration of  $1 \mu\text{g L}^{-1}$  for each PFAS. The spiked reactor tubes were loaded onto a tube revolver (ThermoFisher Scientific), rotated at 40 rpm, and removed at time points of 1, 2, 3, 4, and 7 days. After removal, 8 mL of the experimental solution was transferred from the reactor tubes to a syringe and filtered into a new 15 mL PP centrifuge tube. Samples from batch experiments conducted with PSS#1 and PSS#2 were filtered with a  $0.45 \mu\text{m}$  cellulose acetate filter (Restek) and samples from batch experiments conducted with PSS#3 were filtered with a  $0.22 \mu\text{m}$  polyether sulfone filter (Restek). Previous studies have demonstrated adequate recoveries of the target PFASs in each of the respective stock solutions using these types of syringe filters.<sup>1,2</sup> Then, 8 mL of the filtrate was transferred to a 10 mL glass LC-MS vial (ThermoFisher Scientific) and spiked with 12  $\mu\text{L}$  of the ILIS mixture ( $250 \mu\text{g L}^{-1}$ ) to yield a target ILIS concentration ( $375 \text{ ng L}^{-1}$ ). We note

that ILISs were not spiked in samples from experiments conducted with PSS#3 because no ILISs were available for the zwitterionic PFASs included in PSS#3. The samples were stored at 4 °C until analysis. Control samples were prepared following the same procedure without the addition of a mineral.

The percent sorption ( $\% adsorption_{i,t}$ ) of each PFAS in each replicate sample was calculated by first using the following equation to calculate removal:

$$Rmvl_{i,t} = \frac{C_{control,i,t} - C_{sample,i,j,t}}{C_{control,i,t}} \quad \text{Equation S1}$$

where  $i$  is any of the 40 PFASs;  $j$  is the number of triplicates and  $j = 1, 2, 3$ ;  $t$  is the contact time at which the sample was taken and  $t = 1, 2, 3, 4$ , or 7 days;  $C_{control,i,t}$  is the concentration of  $i$  in the control sample; and  $C_{sample,i,j,t}$  is the concentration of  $i$  in replicate  $j$  taken at time  $t$ .

Then,  $\% adsorption_{i,t}$  of each PFAS was calculated as the arithmetic average of triplicates:

$$\% adsorption_{i,t} = \frac{Rmvl_{i,rep1} + Rmvl_{i,rep2} + Rmvl_{i,rep3}}{3} * 100 \quad \text{Equation S2}$$

Error bars for  $\% adsorption_{i,t}$  were calculated using the standard deviation of triplicates.

### *Batch isotherm experiments*

Stock solutions of each of the four minerals were prepared in 20 mL amber glass vials at concentrations of 0.2, 1, and 5 g L<sup>-1</sup> for ferrihydrite and 20, 100, and 500 g L<sup>-1</sup> for goethite, kaolinite, and montmorillonite, mixed for 30 minutes on a magnetic stirrer, ultra-sonicated for 10 minutes, and spiked at 0.5 mL into a 15 mL PP centrifuge tube containing 10 mL of 10 mmol NaNO<sub>3</sub>. Final concentrations of each mineral in the experiments were 10, 48, and 238 mg L<sup>-1</sup> for ferrihydrite and 1.0, 4.8, and 23.8 g L<sup>-1</sup> for goethite, kaolinite, and montmorillonite. Batch isotherm experiments were performed at pH levels of 4, 5, 6.3, and 8.3 to span the range of pH levels expected to be encountered in subsurface environments. The pH was adjusted using stock solutions of NaOH and HNO<sub>3</sub> to obtain the target pH level. After the initial pH was recorded, 20 µL of at least one of the PFAS stock solutions was spiked into each reactor tube to generate an initial concentration of 1 µg L<sup>-1</sup> for each PFAS. For ferrihydrite, three separate batch experiments were completed using PSS#1, PSS#2, and PSS#3. For goethite, kaolinite, and montmorillonite, two separate batch experiments were completed using a combination of PSS#1 and PSS#2 or PSS#3. The spiked reactor tubes were loaded onto a tube revolver (ThermoFisher Scientific), rotated at 40 rpm, and removed at the equilibrium times predetermined by the kinetic batch experiments (two days for ferrihydrite, four days for goethite, seven days for kaolinite, and seven days for montmorillonite). During the equilibration period, the pH was measured at one or a few intermediate time points in side-by-side control experiments and at most one day prior to the prescribed equilibration time. In the case of pH drift, the pH was readjusted to the target pH level of the experiment using NaOH and HNO<sub>3</sub>. After removal, 8 mL of the experimental solution was transferred from the reactor

tubes to a syringe and filtered into a new 15 mL PP centrifuge tube. Samples from batch experiments conducted with PSS#1 and PSS#2 were filtered with a 0.45 µm cellulose acetate filter (Restek) and samples from batch experiments conducted with PSS#3 were filtered with a 0.22 µm polyether sulfone filter (Restek). Previous studies have demonstrated adequate recoveries of the target PFASs in each of the respective stock solutions using these types of syringe filters.<sup>1,2</sup> Then, 8 mL of the filtrate was transferred to a 10 mL glass LC-MS vial (ThermoFisher Scientific) and spiked with 12 µL of the ILIS mixture (250 µg L<sup>-1</sup>) to yield a target ILIS concentration (375 ng L<sup>-1</sup>). We note that ILISs were not spiked in samples from experiments conducted with PSS#3 because no ILISs were available for the zwitterionic PFASs included in PSS#3. The samples were stored at 4 °C until analysis by means of liquid chromatography coupled to mass spectrometry. Control samples were prepared following the same procedure without the addition of a mineral.

For all experiments, PFAS concentrations measured below the limit of quantification (LOQ) were conservatively estimated to be 1% of the control concentration to enable downstream calculations. Then, for batch experiments using PSS#1 and PSS#2, the equilibrium sorption capacity (ng g<sup>-1</sup>) was calculated as:

$$q_{e,u,j} = \frac{C_{control,u} - C_{sample,u,j}}{C_M} \quad \text{Equation S3}$$

where  $u$  is any of the 37 PFASs from PSS#1 and PSS#2;  $C_M$  is the mineral concentration and  $C_M = 10, 48, \text{ and } 238 \text{ mg L}^{-1}$  for ferrihydrite and  $1.0, 4.8, \text{ and } 23.8 \text{ g L}^{-1}$  for goethite, kaolinite, and montmorillonite; and  $C_{control}$  (ng L<sup>-1</sup>) and  $C_{sample}$  (ng L<sup>-1</sup>) represent the control and equilibrium PFAS concentrations. If calculated  $q_e$  values were negative (concentration

measured in the sample was larger than the control) these negative values were replaced with the value of 1% of the control concentration, normalized by the mineral concentration to enable downstream calculations.

For experiments using PSS#3, controls were first averaged using the following equation:

$$\bar{C}_{control,z} = \frac{\sum_{c=1}^n C_{control,z,c}}{3} \quad \text{Equation S4}$$

where  $z$  is any of the three zwitterions in PSS#3;  $C$  is the control associated with a batch experiment conducted at any one of the three concentrations and  $c = 10, 48, \text{ and } 238 \text{ mg L}^{-1}$  for ferrihydrite and  $1.0, 4.8, \text{ and } 23.8 \text{ g L}^{-1}$  for goethite, kaolinite, and montmorillonite. Consequently, equilibrium sorption capacity ( $\text{ng g}^{-1}$ ) for experiments using PSS#3 were calculated for each mineral as follows:

$$q_{e_{zj,M}} = \frac{\bar{C}_{control,z} - C_{sample,z,j}}{C_M} \quad \text{Equation S5}$$

The distribution coefficient,  $K_d$  ( $\text{L g}^{-1}$ ), was calculated using the following equation:

$$K_{d_{ij \text{ or } zj}} = \frac{q_{e_{ij \text{ or } zj}}}{C_{sample,ij \text{ or } zj}} \quad \text{Equation S6}$$

where  $q_{e_{ij \text{ or } zj,M,pH}}$  is the amount of sorbed PFAS at equilibrium to mineral  $M$ . We averaged the  $K_d$  values calculated from experiments of the smallest, middle, and largest mineral concentrations (nine  $K_d$  values) and we averaged  $K_d$  the values calculated from experiments of the middle and largest concentrations (six  $K_d$  values) and calculated the coefficient of variation for both sets of averages. The average  $K_d$  value that presented the lowest coefficient of variation was selected as the  $K_d$  value. This was done to ensure that the  $K_d$  value that we

report is in the linear range of the otherwise nonlinear isotherm as previously described.<sup>1,3</sup> If the average  $K_d$  value across the smallest, middle, and largest concentration was equal to zero, we used the  $K_d$  value calculated from the average of the middle and largest concentrations. Error bars for log  $K_d$  values were determined using a previously described method for reporting uncertainty of log-transformed data.<sup>4</sup>



### *Batch desorption experiments*

Batch desorption experiments were performed over three decanting cycles for all 40 PFASs and with all four minerals at a pH of 4. We selected this pH value because most PFASs exhibited the highest log  $K_d$  values for each of the four minerals at this pH value (data from the batch isotherm experiments) and we reasoned that desorption would be best quantified after the greatest extent of sorption. Stock solutions of each of the four minerals were prepared in 20 mL amber glass vials at concentrations of 1 g L<sup>-1</sup> for ferrihydrite and 100 g L<sup>-1</sup> for goethite, kaolinite, and montmorillonite, mixed for 30 minutes on a magnetic stirrer, ultra-sonicated for 10 minutes, and spiked at 0.5 mL into a 15 mL PP centrifuge tube containing 10 mL of 10 mmol NaNO<sub>3</sub>. Final concentrations of each mineral in the experiments were 48 mg L<sup>-1</sup> for ferrihydrite and 4.8 g L<sup>-1</sup> for goethite, kaolinite, and montmorillonite. The pH was adjusted using stock solutions of NaOH and HNO<sub>3</sub> to obtain the target pH. After the initial pH was recorded, 20 µL of the PFAS stock solution was spiked into each reactor tube to generate an initial concentration each of 1 µg L<sup>-1</sup>. For all four minerals, two separate batch experiments were completed using either a combination of PSS#1 and PSS#2 or PSS#3. The spiked reactor tubes were loaded onto a tube revolver (ThermoFisher Scientific) and rotated at 40 rpm and were removed at the equilibrium times predetermined by the kinetic batch experiments (two days for ferrihydrite, four days for goethite, seven days for kaolinite, and seven days for montmorillonite). During the equilibration period, the pH was measured at one or a few intermediate time points in side-by-side control experiments and at most one day prior to the prescribed equilibration time. In the case of pH drift, the pH was readjusted to the target pH level of the experiment using NaOH and HNO<sub>3</sub>. After removal, the reactor tubes were

centrifuged at 4,000 rpm for 20 minutes. For goethite only, the sample was filtered after being centrifuged (using the filters described for each PSS in the batch isotherm experiments) due to incomplete separation following centrifugation. Then, 8 mL of the supernatant (or filtrate for goethite) was transferred to a 10 mL glass LC-MS vial (ThermoFisher Scientific) and spiked with 12  $\mu\text{L}$  of the ILIS mixture ( $250 \mu\text{g L}^{-1}$ ) to yield a target ILIS concentration ( $375 \text{ ng L}^{-1}$ ). We note that ILISs were not spiked in samples from experiments conducted with PSS#3 because no ILISs were available for the zwitterionic PFASs included in PSS#3. Then, 8 mL of clean (PFAS-free) 10 mmol  $\text{NaNO}_3$  was added back to the reactor tube and placed back on the tube revolver for desorption and re-equilibration. This process was repeated three times in total to assess desorption over three decanting cycles. All samples were stored at  $4^\circ\text{C}$  until analysis by means of liquid chromatography coupled to mass spectrometry. Control samples were prepared following the same procedure without the addition of a mineral.

Two additional quality control criteria were needed to process the data from the batch desorption experiments prior to estimating the extent of desorption. First, we must observe some sorption of a PFAS to eventually estimate the extent of desorption. Therefore, we only considered PFASs for which  $\% \text{ adsorption}_{i,t}$  was at least 9%. Second, to account for potential PFAS losses on the reactor tubes, we only considered PFASs that exhibited the expected 80% reduction in PFAS concentration in the control reactors (this is the reduction expected when decanting 8 mL from a 10 mL reactor and replacing it with clean PFAS-free solution). For those PFASs that met these two criteria, the mass ( $m$ ) of each PFAS remaining on the mineral after each desorption cycle was calculated using the following equation:

$$m_{i,d} = q_{e,j,i,d} * V * C_M \quad \text{Equation S7}$$

where  $i$  is any of the 40 PFASs that pass the QC criteria,  $j$  is the number of triplicates and  $j = 1, 2, 3$ ,  $d$  is the decanting cycle and  $d = 1, 2, 3$ ,  $q_{e,j,i,d}$  (ng g<sup>-1</sup>) is the amount of PFAS sorbed at equilibrium, and  $V$  (L) is the volume of solution in the reactor tube. Percent desorption was then calculated using the following equation:

$$\% \text{ desorption}_{i,d,j} = \left[ \frac{m_{i,d,j} - m_{i,d+1,j}}{m_{i,d1,j}} \right] * 100 \quad \text{Equation S8}$$

where  $d+1$  is the decanting cycle following the previous cycle ( $d$ ), and  $d1$  is the first decanting cycle.

## Analytical method

The HPLC-HRMS was operated with electrospray ionization in negative polarity mode for experiments spiked with PSS#1, in positive-negative polarity switching mode for experiments spiked with PSS#2 (or for experiments spiked with PSS#1 and PSS#2), and in positive polarity mode for experiments spiked with PSS#3. Analytical information for all PFASs and their ILISs is provided in **Table S4**. The mobile phase consisted of (A) 20 mM ammonium acetate in LC-MS grade water and (B) LC-MS grade methanol (100 %). Samples were injected at 5 mL volumes onto a Hypersil Gold dC18 12  $\mu\text{m}$  2.1 x 20 mm trap column (ThermoFisher Scientific) at room temperature (21- 22°C) via a loading pump delivering 1 mL min<sup>-1</sup> of a mobile phase gradient at 99% A and eluted onto an Atlantis® dC18 5  $\mu\text{m}$  2.1 x 150 mm analytical column (Waters) at 25°C via an elution pump delivering 0.3 mL min<sup>-1</sup> of a mobile phase gradient at 60% A. The mobile phase gradient program is described in **Table S5**. A matrix-matched calibration curve (n = 9) was prepared with concentrations ranging from 0 to 1000 ng L<sup>-1</sup> and spiked with 12  $\mu\text{L}$  of the ILIS mixture (250  $\mu\text{g}$  L<sup>-1</sup>). Quantification of PFASs was from the calibration curve using the PFAS product ion-to-ILIS peak area ratio responses by 1/x weighted linear least-squares regression. Calibration curves were run at the beginning of the analytical run. Instrument blanks (with no target PFASs or ILISs) were run before and after the calibration curve and each batch of triplicate samples. One quality control (QC) sample (with target PFASs and ILISs) was placed at the start of every analytical sequence, to ensure minimal contamination and adequate MS performance (QC tolerance set at  $\pm$  30%). Blanks containing LC-MS water were added after every three samples to prevent carryover. The limit of quantification (LOQ) for each PFAS was determined as the lowest point on the calibration curve

with at least five MS scans and a PFAS product ion-to-ILIS peak area ratio that could be distinguished from the blank. PFAS spike controls were used to determine the PFAS recovery rate during analysis; recovery rate threshold was set at  $\pm 50\%$  for each PFAS to be considered as reliable data and a variable set of PFASs were considered as reliable data for each type of experiment after analysis.

**Table S4.** Analytical information of all PFASs and their assigned ILISs.

| Name                         | Acronym | RT (min) | Polarity | Precursor Ion Mass (Da) | Product Ion Mass (Da) | ILIS <sup>a</sup>                    | pK <sub>a</sub> <sup>b</sup> |
|------------------------------|---------|----------|----------|-------------------------|-----------------------|--------------------------------------|------------------------------|
| Perfluorobutanoic acid       | PFBA    | 9.2      | neg      | 212.9786                | 168.9879              | <sup>13</sup> C <sub>4</sub> - PFBA  | -0.21 to 0.37                |
| Perfluoropentanoic acid      | PFPeA   | 12.3     | neg      | 262.9760                | 218.9863              | <sup>13</sup> C <sub>2</sub> - PFHxA | -0.80 to 0.40                |
| Perfluorohexanoic acid       | PFHxA   | 15.8     | neg      | 312.9722                | 268.9829              | <sup>13</sup> C <sub>2</sub> - PFHxA | 0.20 to 0.42                 |
| Perfluoroheptanoic acid      | PFHpA   | 18.8     | neg      | 362.9690                | 318.9794              | <sup>13</sup> C <sub>2</sub> - PFHxA | 0.01 to 0.47                 |
| Perfluorooctanoic acid       | PFOA    | 21.9     | neg      | 412.9659                | 368.9767              | <sup>13</sup> C <sub>4</sub> - PFOA  | 0.34                         |
| Perfluorononanoic acid       | PFNA    | 23.9     | neg      | 462.9627                | 418.9737              | <sup>13</sup> C <sub>5</sub> - PFNA  | 0.23 to 0.52                 |
| Perfluorodecanoic acid       | PFDA    | 25.2     | neg      | 512.9600                | 468.9703              | <sup>13</sup> C <sub>2</sub> - PFDA  | 0.40 to 0.52                 |
| Perfluoroundecanoic acid     | PFUnA   | 26.7     | neg      | 562.9563                | 518.9669              | <sup>13</sup> C <sub>2</sub> - PFUnA | 0.52 to 0.54                 |
| Perfluorododecanoic acid     | PFDoA   | 27.5     | neg      | 612.9531                | 568.9635              | <sup>13</sup> C <sub>2</sub> - PFDoA | 0.52 to 0.54                 |
| Perfluorotridecanoic acid    | PFTTrDA | 28.7     | neg      | 662.9499                | 618.9601              | <sup>13</sup> C <sub>2</sub> - PFDoA | 0.52 to -0.54                |
| Perfluorotetradecanoic acid  | PFTA    | 29.6     | neg      | 712.9467                | 668.9567              | <sup>13</sup> C <sub>2</sub> - PFDoA | 0.52 to -0.54                |
| Perfluorobutanesulfonic acid | PFBS    | 13.7     | neg      | 298.9424                | 98.9543               | <sup>18</sup> O <sub>2</sub> - PFHxS | -3.57 to -1.61               |

| Name                             | Acronym     | RT (min) | Polarity | Precursor Ion Mass (Da) | Product Ion Mass (Da) | ILIS <sup>a</sup>                    | pK <sub>a</sub> <sup>b</sup> |
|----------------------------------|-------------|----------|----------|-------------------------|-----------------------|--------------------------------------|------------------------------|
| Perfluorohexanesulfonic acid     | PFHxS       | 19.7     | neg      | 398.9360                | 98.9543               | <sup>18</sup> O <sub>2</sub> - PFHxS | -3.34 to -1.64               |
| Perfluoroheptanesulfonic acid    | PFHpS       | 21.8     | neg      | 448.9334                | 98.9543               | <sup>13</sup> C <sub>4</sub> - PFOS  | -3.27 to -1.64               |
| Perfluorooctanesulfonic acid     | PFOS        | 23.7     | neg      | 498.9296                | 98.9543               | <sup>13</sup> C <sub>4</sub> - PFOS  | -3.27 to -1.64               |
| Perfluorodecanesulfonic acid     | PFDS        | 26.2     | neg      | 598.9238                | 98.9543               | <sup>13</sup> C <sub>4</sub> - PFOS  | -3.26 to -1.54               |
| 2-Perfluorohexyl ethanoic acid   | 6:2 FTCA    | 20.0     | neg      | 376.9853                | 292.9833              | <sup>18</sup> O <sub>2</sub> - PFHxS | 2.72 to 3.38                 |
| 2-Perfluorooctyl ethanoic acid   | 8:2 FTCA    | 24.4     | neg      | 476.9789                | 62.9875               | <sup>13</sup> C <sub>5</sub> - PFNA  | 2.69 to 3.41                 |
| 2-Perfluorodecyl ethanoic acid   | 10:2 FTCA   | 27.5     | neg      | 576.9725                | 62.9873               | <sup>13</sup> C <sub>2</sub> - PFUnA | 2.83 to 3.42                 |
| 3-Perfluoropropyl propanoic acid | 3:3 FTCA    | 13.8     | neg      | 241.0105                | 116.9944              | <sup>13</sup> C <sub>4</sub> - PFOA  | 3.06 to 4.13                 |
| 3-Perfluoropentyl propanoic acid | 5:3 FTCA    | 19.8     | neg      | 341.0041                | 216.9888              | <sup>13</sup> C <sub>2</sub> - PFHxA | 3.54 to 4.18                 |
| 3-Perfluoroheptyl propanoic acid | 7:3 FTCA    | 23.6     | neg      | 440.9977                | 316.9829              | <sup>13</sup> C <sub>2</sub> - PFHxA | 3.36 to 4.22                 |
| 2H-Perfluoro-2-octenoic acid     | 5:1:2 FTUCA | 19.2     | neg      | 356.9790                | 292.9832              | <sup>18</sup> O <sub>2</sub> - PFHxS | 0.29 to 2.89                 |
| 2H-Perfluoro-2-decenoic acid     | 7:1:2 FTUCA | 24.2     | neg      | 456.9727                | 392.9771              | <sup>13</sup> C <sub>5</sub> - PFNA  | 0.45 to 2.73                 |

| Name                                             | Acronym     | RT (min) | Polarity | Precursor Ion Mass (Da) | Product Ion Mass (Da) | ILIS <sup>a</sup>                    | pK <sub>a</sub> <sup>b</sup> |
|--------------------------------------------------|-------------|----------|----------|-------------------------|-----------------------|--------------------------------------|------------------------------|
| 2H-Perfluoro-2-dodecenoic acid                   | 9:1:2 FTUCA | 26.7     | neg      | 556.9663                | 492.9707              | <sup>13</sup> C <sub>2</sub> - PFUnA | 0.57 to 2.75                 |
| 1H,1H,2H,2H-Perfluorohexanesulphonic acid        | 4:2 FTS     | 16.5     | neg      | 326.9743                | 80.9637               | <sup>13</sup> C <sub>2</sub> - PFHxA | 0.93 to 1.25                 |
| 1H,1H,2H,2H-Perfluorooctanesulphonic acid        | 6:2 FTS     | 21.5     | neg      | 426.9679                | 80.9637               | <sup>13</sup> C <sub>4</sub> - PFOA  | 1.23 to 1.30                 |
| 1H,1H,2H,2H-perfluorodecanesulfonic acid         | 8:2 FTS     | 24.7     | neg      | 526.9615                | 80.9637               | <sup>13</sup> C <sub>2</sub> - PFDA  | 1.32 to 1.33                 |
| 1H,1H,2H,2H-perfluorododecanesulfonic acid       | 10:2 FTS    | 27.6     | neg      | 626.9551                | 80.9637               | <sup>13</sup> C <sub>2</sub> - PFDoA | 1.32 to 1.48                 |
| Perfluoro-1-butanefulfonamide                    | FBSA        | 16.2     | neg      | 297.9590                | 77.9638               | <sup>13</sup> C <sub>2</sub> - PFHxA | 6.48 to 6.97                 |
| Perfluoro-1-octanesulfonamide                    | FOSA        | 26.5     | neg      | 497.9462                | 77.9638               | <sup>13</sup> C <sub>2</sub> - PFUnA | 6.78 to 7.01                 |
| Perfluoro-N-(2- hydroxyethyl)-1butanesulfonamide | FBSE        | 19.4     | neg      | 341.9852                | 64.9689               | <sup>13</sup> C <sub>2</sub> - PFHxA | 6.13 to 8.15                 |
| Perfluoro-N-(2- methoxyethyl)-1butanesulfonamide | MeFBSE      | 20.0     | neg      | 356.0008                | 292.9833              | <sup>13</sup> C <sub>4</sub> - PFOA  | 6.17 to 14.1                 |
| N-methylperfluoro-1octanesulfonamidoacetic acid  | N-MeFOSAA   | 26.2     | neg      | 569.9673                | 82.9595               | <sup>13</sup> C <sub>2</sub> - PFUnA | -0.36 to 2.92                |
| N-ethylperfluoro-1octanesulfonamidoacetic acid   | N-EtFOSAA   | 26.4     | neg      | 583.9830                | 168.9885              | <sup>13</sup> C <sub>2</sub> - PFUnA | 0.57 to 2.93                 |
| Undecafluorooctyl)dimethylammonio]acetate        | 5:3 FTB     | 18.7     | pos      | 414.0922                | 168.9885              | No ILIS                              | 1.76                         |



| Name                                                                       | Acronym                              | RT (min) | Polarity | Precursor Ion Mass (Da) | Product Ion Mass (Da) | ILIS <sup>a</sup> | pK <sub>a</sub> <sup>b</sup> |
|----------------------------------------------------------------------------|--------------------------------------|----------|----------|-------------------------|-----------------------|-------------------|------------------------------|
| Dodecafluorooctyl)dimethylammonio]acetate                                  | 5:1:2 FTB                            | 19.1     | pos      | 432.0827                | 448.9334              | No ILIS           | 1.73                         |
| (3-dimethylaminopropan-1-yl) perfluoro-1-hexane-sulfonamide                | AmPr-FHxSA                           | 28       | pos      | 485.0563                | 85.0888               | No ILIS           | 9.82                         |
| [3-perfluoro-1-hexanesulfonamido) propan-1-yl]-N-trimethylammonium         | TAmPr-FHxSA                          | 27       | pos      | 499.0719                | 60.0815               | No ILIS           | 5.86                         |
| 6:2 fluorotelomer sulfonamide alkylbetanine                                | 6:2 FTAB                             | 22.9     | pos      | 571.0931                | 58.0658               | No ILIS           | 1.76 to 6.15                 |
| Sodium perfluoro-1hexane[ <sup>18</sup> O <sub>2</sub> ]sulfonate          | <sup>18</sup> O <sub>2</sub> - PFHxS | 18.6     | neg      | 402.9451                | 83.9643               | NA                | NA                           |
| Sodium perfluoro-1-[1,2,3,4- <sup>13</sup> C <sub>4</sub> ]octanesulfonate | <sup>13</sup> C <sub>4</sub> - PFOS  | 23       | neg      | 502.9436                | 79.9558               | NA                | NA                           |
| Perfluoro-n-[ <sup>13</sup> C <sub>4</sub> ]butanoic acid                  | <sup>13</sup> C <sub>4</sub> - PFBA  | 9.7      | neg      | 216.9926                | 171.9984              | NA                | NA                           |
| Perfluoro-n-[1,2- <sup>13</sup> C <sub>2</sub> ]hexanoic acid              | <sup>13</sup> C <sub>2</sub> - PFHxA | 15.7     | neg      | 314.9795                | 269.9864              | NA                | NA                           |
| Perfluoro-n-[1,2,3,4- <sup>13</sup> C <sub>4</sub> ]octanoic acid          | <sup>13</sup> C <sub>4</sub> - PFOA  | 21.1     | neg      | 416.9798                | 371.9862              | NA                | NA                           |
| Perfluoro-n-[1,2,3,4,5- <sup>13</sup> C <sub>5</sub> ]nonanoic acid        | <sup>13</sup> C <sub>5</sub> - PFNA  | 23       | neg      | 467.9800                | 422.9866              | NA                | NA                           |
| Perfluoro-n-[1,2- <sup>13</sup> C <sub>2</sub> ]decanoic acid              | <sup>13</sup> C <sub>2</sub> - PFDA  | 24.7     | neg      | 514.9667                | 469.9729              | NA                | NA                           |
| Perfluoro-n-[1,2- <sup>13</sup> C <sub>2</sub> ]undecanoic acid            | <sup>13</sup> C <sub>2</sub> - PFUnA | 26.3     | neg      | 564.9636                | 519.9697              | NA                | NA                           |

| Name                                                            | Acronym                              | RT (min) | Polarity | Precursor Ion Mass (Da) | Product Ion Mass (Da) | ILIS <sup>a</sup> | pK <sub>a</sub> <sup>b</sup> |
|-----------------------------------------------------------------|--------------------------------------|----------|----------|-------------------------|-----------------------|-------------------|------------------------------|
| Perfluoro-n-[1,2- <sup>13</sup> C <sub>2</sub> ]dodecanoic acid | <sup>13</sup> C <sub>2</sub> - PFDoA | 27.4     | neg      | 614.9604                | 568.964               | NA                | NA                           |

<sup>a</sup>ILISs were assigned to target analytes based on recommendations in previously established methods,<sup>5</sup> or based on better matches of retention time (RT), chain length, or head group <sup>b</sup>pK<sub>a</sub> values are estimated and were obtained from The CompTox Chemicals Dashboard (<https://comptox.epa.gov/dashboard/>).

**Table S5.** The mobile phase gradient program for LC-MS analysis.

| Pump | Retention Time (min) | Flow Rate (mL min <sup>-1</sup> ) | Mobile Phase A (%) <sup>a</sup>              | Mobile Phase B (%) <sup>b</sup>              |
|------|----------------------|-----------------------------------|----------------------------------------------|----------------------------------------------|
| LPG  | 0.000                | 1.000                             | 99                                           | 1                                            |
|      | 5.100                | 1.000                             | 99                                           | 1                                            |
|      | 5.110                | 0.000                             | 99                                           | 1                                            |
|      | 37.200               | 0.000                             | 99                                           | 1                                            |
|      | 37.300               | 1.000                             | 2                                            | 98                                           |
|      | 41.300               | 1.000                             | 2                                            | 98                                           |
|      | 41.400               | 1.000                             | 99                                           | 1                                            |
|      | 42.100               | 1.000                             | 99                                           | 1                                            |
| HPG  | 0.000                | 0.300                             | 60%                                          | 40%                                          |
|      | 6.100                | 0.300                             | 60%                                          | 40%                                          |
|      | 6.1-30.1             | 0.300                             | decreasing rate<br>2.083 % min <sup>-1</sup> | increasing rate<br>2.083 % min <sup>-1</sup> |
|      | 30.100               | 0.300                             | 10%                                          | 90%                                          |
|      | 37.100               | 0.300                             | 10%                                          | 90%                                          |
|      | 37.110               | 0.300                             | 60%                                          | 40%                                          |
|      | 42.100               | 0.300                             | 60%                                          | 40%                                          |

<sup>a</sup>Mobile Phase A consisted of 20 mM ammonium acetate in LC-MS grade water.

<sup>b</sup>Mobile Phase B consisted of LC-MS grade methanol (100 %).

## Results and discussion

### Quality Control for PFAS Data

All batch experiments were spiked with one or more of the three PFAS stock solutions (PSSs) that contained a total of 40 PFASs. However, the number of PFASs for which we report data for each type of batch experiment varies depending on our quality control (QC) criteria. For the batch kinetic experiments, we report data for any PFAS for which the concentrations in all control samples ( $C_{control,i,t}$ ) is within  $\pm 50\%$  of the expected spike concentration ( $1000 \text{ ng L}^{-1}$ ). For the batch isotherm experiments, we report data for any PFAS for which the average concentrations in all control samples across the three mineral concentrations ( $C_{control,u,M,pH}$ ) is within  $\pm 55\%$  of the expected spike concentration ( $1000 \text{ ng L}^{-1}$ ). An exception was made for the three zwitterions in PSS#3 (AmPr-FHxSA, TAmPr-FHxSA and 6:2 FTAB) for which we report data even when PFAS concentrations are outside  $\pm 55\%$  QC threshold due to the lack of ILISs for those PFASs. For the batch desorption experiments, we report data for: any PFAS for which the concentrations in all control samples ( $C_{control,i,t}$ ) are within  $\pm 50\%$  of the expected spike concentration ( $1000 \text{ ng L}^{-1}$ ); for which  $\% \text{ adsorption}_{i,t}$  was at least 9% in the first cycle; and for which we observe the expected 80% ( $\pm 10\%$ ) reduction in PFAS concentration in the control reactors across the three decanting cycles (this is the reduction expected when decanting 8 mL from a 10 mL reactor and replacing it with clean PFAS-free solution). One exception was made for 5:1:2 FTB for which we relaxed the range of the expected 80% reduction in PFAS concentration in the control from  $\pm 10\%$  to  $\pm 15\%$  to be able to report desorption behavior of at least one zwitterion across all four minerals.

**Table S6.** Summary of PFASs that pass our QC criteria for each type of batch experiment (X = pass).

| Experiment           | Kinetics |    |    |    | Isotherm |    |    |    |    |    |    |    |    |    |    |    |    |    |    |    | Desorption |   |   |   |
|----------------------|----------|----|----|----|----------|----|----|----|----|----|----|----|----|----|----|----|----|----|----|----|------------|---|---|---|
| pH <sup>1</sup>      | 5        | 8  | 6  | 4  | 4        | 5  | 6  | 8  | 4  | 5  | 6  | 8  | 4  | 5  | 6  | 8  | 4  | 5  | 6  | 8  | 4          | 4 | 4 | 4 |
| Mineral <sup>2</sup> | F        | G  | K  | M  | F        | F  | F  | F  | G  | G  | G  | G  | K  | K  | K  | K  | M  | M  | M  | M  | F          | G | K | M |
| PFBA                 | X        | X  | X  | X  | X        | X  | X  | X  | X  | X  | X  | X  | X  | X  | X  | X  | X  | X  | X  | X  |            |   |   |   |
| PFPeA                |          |    |    |    | X        | X  | X  | X  | X  | X  | X  | X  | X  | X  | X  | X  | X  | X  | X  | X  |            | X | X | X |
| PFHxA                | X        | X  | X  | X  | X        | X  | X  | X  | X  | X  | X  | X  | X  | X  | X  | X  | X  | X  | X  | X  |            |   |   |   |
| PFHpA                | X        | X  | X  | X  | X        | X  | X  | X  | X  | X  | X  | X  | X  | X  | X  | X  | X  | X  | X  | X  | X          |   |   |   |
| PFOA                 | X        | X  | X  | X  | X        | X  | X  | X  | X  | X  | X  | X  | X  | X  | X  | X  | X  | X  | X  | X  | X          | X |   |   |
| PFNA                 | X        | X  | X  | X  | X        | X  | X  | X  | X  | X  | X  | X  | X  | X  | X  | X  | X  | X  | X  | X  | X          |   |   |   |
| PFDA                 | X        | X  | X  | X  | X        | X  | X  | X  | X  | X  | X  |    | X  | X  | X  | X  | X  | X  | X  | X  |            |   |   |   |
| PFUnA                | X        | X  | X  | X  |          | X  | X  | X  |    | X  | X  |    |    |    |    |    | X  |    | X  | X  |            |   |   |   |
| PFDoA                | X        | X  | X  | X  |          | X  | X  | X  |    |    |    |    |    |    |    |    |    |    |    |    |            |   |   |   |
| PFTTrDA              |          |    |    |    |          |    |    |    |    |    |    |    |    |    |    |    |    |    |    |    |            |   |   |   |
| PFTA                 |          |    |    |    |          |    |    |    |    |    |    |    |    |    |    |    |    |    |    |    |            |   |   |   |
| PFBS                 | X        | X  | X  | X  | X        | X  |    | X  |    |    |    |    | X  | X  | X  | X  | X  |    |    | X  |            |   |   |   |
| PFHxS                | X        | X  | X  | X  | X        | X  | X  | X  | X  | X  | X  | X  | X  | X  | X  | X  | X  | X  | X  | X  | X          |   |   |   |
| PFHpS                | X        | X  | X  | X  | X        | X  | X  | X  | X  | X  | X  | X  | X  | X  | X  | X  | X  | X  | X  | X  | X          |   |   |   |
| PFOS                 | X        | X  | X  | X  | X        | X  | X  | X  | X  | X  | X  | X  | X  | X  | X  | X  | X  | X  | X  | X  |            |   |   |   |
| PFDS                 | X        |    | X  |    |          |    |    |    |    |    |    |    |    |    |    |    |    |    |    |    |            |   |   |   |
| 6:2 FTCA             | X        | X  | X  | X  | X        | X  | X  | X  | X  | X  | X  | X  | X  | X  | X  | X  | X  | X  | X  | X  | X          | X |   | X |
| 8:2 FTCA             | X        | X  | X  | X  |          | X  | X  | X  |    | X  | X  | X  |    | X  | X  | X  | X  | X  | X  | X  |            |   |   |   |
| 10:2 FTCA            | X        |    |    |    |          |    | X  |    |    |    |    |    |    | X  |    |    |    |    |    |    |            |   |   |   |
| 3:3 FTCA             |          |    |    | X  | X        | X  | X  | X  |    |    |    |    | X  | X  | X  |    |    | X  | X  | X  |            | X |   | X |
| 5:3 FTCA             | X        | X  | X  | X  | X        | X  | X  | X  | X  | X  | X  | X  | X  | X  | X  | X  | X  | X  | X  | X  | X          |   | X | X |
| 7:3 FTCA             |          | X  | X  | X  |          | X  | X  | X  |    | X  | X  | X  |    | X  | X  | X  | X  | X  | X  | X  |            |   |   |   |
| 5:1:2 FTUCA          | X        | X  | X  | X  | X        | X  | X  | X  | X  | X  | X  | X  | X  | X  | X  | X  | X  | X  | X  | X  | X          | X | X | X |
| 7:1:2 FTUCA          | X        | X  | X  | X  | X        | X  | X  | X  |    | X  | X  | X  | X  | X  | X  | X  | X  | X  | X  | X  |            |   |   |   |
| 9:1:2 FTUCA          |          |    |    |    |          |    |    |    |    |    |    |    |    |    |    |    |    |    |    |    |            |   |   |   |
| 4:2 FTS              |          | X  | X  | X  | X        |    | X  | X  | X  |    |    |    | X  | X  |    | X  |    |    | X  | X  |            |   |   |   |
| 6:2 FTS              | X        | X  | X  | X  | X        | X  | X  | X  |    |    |    |    | X  | X  |    | X  |    | X  |    | X  | X          |   |   |   |
| 8:2 FTS              | X        | X  | X  | X  | X        | X  | X  | X  | X  | X  | X  | X  |    | X  | X  | X  | X  | X  | X  | X  |            |   |   |   |
| 10:2 FTS             |          |    | X  | X  |          |    |    |    |    | X  | X  |    |    |    |    |    |    |    |    |    |            |   |   |   |
| FBSA                 | X        | X  | X  | X  | X        | X  |    | X  | X  | X  | X  | X  | X  | X  | X  | X  | X  | X  | X  | X  | X          |   |   |   |
| FOSA                 |          |    |    |    |          |    |    |    |    |    |    |    |    |    |    |    |    |    |    |    |            |   |   |   |
| FBSE                 | X        | X  | X  | X  | X        | X  | X  | X  | X  | X  | X  | X  | X  | X  | X  | X  | X  | X  | X  | X  |            |   |   |   |
| MeFBSE               | X        | X  | X  | X  | X        | X  | X  | X  | X  | X  | X  | X  | X  | X  | X  | X  | X  | X  | X  | X  | X          | X |   | X |
| N-MeFOSAA            |          |    |    | X  |          | X  | X  | X  |    |    | X  | X  |    | X  | X  |    | X  | X  |    |    |            |   |   |   |
| N-EtFOSAA            |          |    |    |    |          | X  | X  | X  |    |    | X  |    |    |    |    |    |    |    |    |    |            |   |   |   |
| 5:3 FTB              | X        | X  | X  | X  | X        | X  | X  | X  | X  | X  | X  | X  | X  | X  | X  | X  | X  | X  | X  | X  |            |   | X | X |
| 5:1:2 FTB            | X        | X  | X  | X  | X        | X  | X  | X  | X  | X  | X  | X  | X  | X  | X  | X  | X  | X  | X  | X  |            | X | X |   |
| AmPr-FHxSA           | X        |    | X  | X  | X        | X  | X  | X  | X  | X  | X  |    | X  | X  | X  | X  | X  | X  | X  | X  |            |   |   |   |
| TAmPr-FHxSA          | X        |    | X  | X  | X        | X  | X  | X  | X  | X  | X  | X  | X  | X  | X  | X  | X  | X  | X  | X  |            |   |   |   |
| 6:2 FTAB             | X        | X  | X  | X  | X        | X  | X  | X  | X  | X  | X  | X  | X  | X  | X  | X  | X  | X  | X  | X  |            |   |   |   |
| <b>Total PFAS</b>    | 29       | 27 | 31 | 32 | 27       | 33 | 32 | 34 | 23 | 27 | 29 | 26 | 26 | 31 | 27 | 27 | 27 | 28 | 28 | 29 | 11         | 7 | 5 | 7 |

<sup>1</sup>Actual pH levels were 4, 5, 6.3, and 8.3; <sup>2</sup>F = ferrihydrite, G = goethite, K = kaolinite, M = montmorillonite.

## Mineral characterization

**Table S7.** Zeta-potential for each mineral at varying pH levels.

| Mineral                                  | pH  | zeta potential (mV) | standard deviation (mv) |
|------------------------------------------|-----|---------------------|-------------------------|
| Ferrihydrite (238 mg L <sup>-1</sup> )   | 3.9 | 28.8                | 5.5                     |
|                                          | 4.2 | 23.7                | 4.7                     |
|                                          | 6.3 | 7.0                 | 6.8                     |
|                                          | 8.3 | -7.2                | 6.7                     |
| Goethite (4.8 g L <sup>-1</sup> )        | 3.9 | 14.9                | 4.9                     |
|                                          | 5.3 | 3.0                 | 7.0                     |
|                                          | 6.2 | -2.3                | 9.0                     |
|                                          | 8.7 | -6.7                | 5.9                     |
| Kaolinite (4.8 g L <sup>-1</sup> )       | 4   | -3.5                | 4.2                     |
|                                          | 5.2 | -19.3               | 5.5                     |
|                                          | 6.2 | -50.1               | 8.0                     |
|                                          | 8.2 | -48.6               | 9.2                     |
| Montmorillonite (4.8 g L <sup>-1</sup> ) | 4.0 | -17.9               | 6.6                     |
|                                          | 5   | -21.3               | 7.6                     |
|                                          | 6.3 | -29.6               | 9.0                     |
|                                          | 8.5 | -30.4               | 5.6                     |

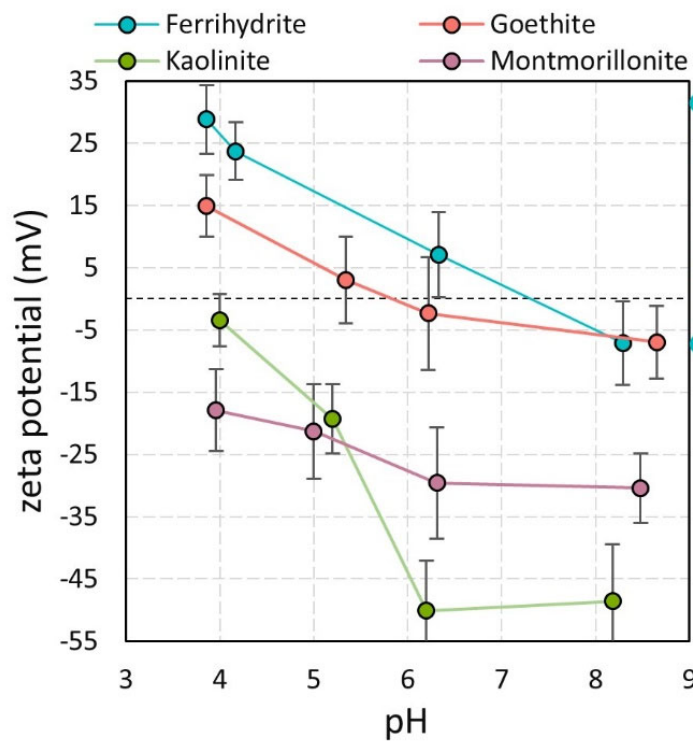

**Figure S1.** Zeta-potential (mV) as a function of pH (approx. 4 - 8.3) for ferrihydrite (blue), goethite (red), kaolinite (green), and montmorillonite (purple). The vertical dashed lines on the right represent the range of zeta-potential for each mineral. Error bars are the standard deviation of triplicate measurements.

## Batch kinetic experiments

**Table S8.** Equilibrium sorption time for each PFAS on each mineral.

|             | Equilibrium sorption time [days] |          |                 |           |
|-------------|----------------------------------|----------|-----------------|-----------|
|             | Ferrihydrite                     | Goethite | Montmorillonite | Kaolinite |
| PFBA        | 2                                | 2        | 2               | 4         |
| PFHxA       | 2                                | 3        | 2               | 2         |
| PFHpA       | 2                                | 3        | 2               | 2         |
| PFOA        | 2                                | 2        | 2               | 2         |
| PFNA        | 2                                | 2        | 2               | 2         |
| PFDA        | 2                                | 2        | 2               | 3         |
| PFUnA       | 2                                | 2        | 3               | 7         |
| PFDaA       | 2                                | 2        | 3               | 2         |
| PFBS        | 2                                | 2        | 2               | 2         |
| PFHxS       | 2                                | 2        | 2               | 2         |
| PFHpS       | 2                                | 2        | 2               | 2         |
| PFOS        | 2                                | 2        | 2               | 3         |
| PFDS        | 2                                | NA       | 3               | NA        |
| 6:2 FTCA    | 2                                | 7        | 7               | 2         |
| 8:2 FTCA    | 2                                | 4        | 2               | 4         |
| 10:2 FTCA   | 2                                | NA       | NA              | NA        |
| 3:3 FTCA    | NA                               | NA       | NA              | 2         |
| 5:3 FTCA    | 3                                | 2        | 3               | 2         |
| 7:3 FTCA    | NA                               | 2        | 2               | 2         |
| 5:1:2 FTUCA | 3                                | 2        | 4               | 3         |
| 7:1:2 FTUCA | 2                                | 2        | 2               | 3         |
| 4:2 FTS     | NA                               | 2        | 7               | 3         |
| 6:2 FTS     | 2                                | 7        | 4               | 3         |
| 8:2 FTS     | 2                                | 2        | 7               | 2         |
| 10:2 FTS    | NA                               | NA       | 2               | 2         |
| FBSA        | 2                                | 2        | 2               | 2         |
| FBSE        | 3                                | 2        | 2               | 2         |
| MeFBSE      | 3                                | 2        | 4               | 2         |
| N-MeFOSAA   | NA                               | NA       | NA              | 3         |
| 5:3 FTB     | 3                                | 2        | 2               | 2         |
| 5:1:2 FTB   | 2                                | 2        | 3               | 2         |
| AmPr-FHxSA  | 2                                | NA       | 2               | 4         |
| TAmPr-FHxSA | 2                                | NA       | 2               | 2         |
| 6:2 FTAB    | 3                                | 2        | 2               | 2         |



## Batch isotherm experiments

**Table S9.** log  $K_d$  values reported as average  $\pm$  standard deviation for each PFAS on ferrihydrite.

| log $K_d$ values (units as $L\ g^{-1}$ prior to log transformation) for each PFAS on ferrihydrite |       |       |      |       |       |      |        |       |      |        |       |      |
|---------------------------------------------------------------------------------------------------|-------|-------|------|-------|-------|------|--------|-------|------|--------|-------|------|
|                                                                                                   | pH 4  |       |      | pH 5  |       |      | pH 6.3 |       |      | pH 8.3 |       |      |
| PFBA                                                                                              | -1.10 | $\pm$ | 0.39 | -0.60 | $\pm$ | 0.42 | -1.03  | $\pm$ | 0.40 | -0.97  | $\pm$ | 0.38 |
| PFPeA                                                                                             | 0.40  | $\pm$ | 0.60 | -0.28 | $\pm$ | 0.37 | -0.96  | $\pm$ | 0.36 | -0.12  | $\pm$ | 0.54 |
| PFHxA                                                                                             | 0.62  | $\pm$ | 0.54 | -0.08 | $\pm$ | 0.28 | -0.36  | $\pm$ | 0.41 | -0.92  | $\pm$ | 0.34 |
| PFHpA                                                                                             | 0.53  | $\pm$ | 0.51 | 0.38  | $\pm$ | 0.19 | -0.23  | $\pm$ | 0.56 | -0.32  | $\pm$ | 0.41 |
| PFOA                                                                                              | 0.61  | $\pm$ | 0.48 | 0.42  | $\pm$ | 0.18 | 0.45   | $\pm$ | 0.50 | 0.06   | $\pm$ | 0.42 |
| PFNA                                                                                              | 1.37  | $\pm$ | 0.37 | 0.92  | $\pm$ | 0.13 | -0.46  | $\pm$ | 0.33 | -0.02  | $\pm$ | 0.42 |
| PFDA                                                                                              | 1.88  | $\pm$ | 0.31 | 1.48  | $\pm$ | 0.14 | 0.23   | $\pm$ | 0.14 | 0.34   | $\pm$ | 0.47 |
| PFUnA                                                                                             | N/A   | $\pm$ | N/A  | 1.79  | $\pm$ | 0.28 | 0.79   | $\pm$ | 0.06 | 0.52   | $\pm$ | 0.55 |
| PFDoA                                                                                             | N/A   | $\pm$ | N/A  | 2.10  | $\pm$ | 0.29 | 1.23   | $\pm$ | 0.19 | 0.73   | $\pm$ | 0.28 |
| PFBS                                                                                              | -1.40 | $\pm$ | 0.25 | 0.45  | $\pm$ | 0.66 | N/A    | $\pm$ | N/A  | -1.07  | $\pm$ | 0.36 |
| PFHxS                                                                                             | 0.72  | $\pm$ | 0.63 | 0.01  | $\pm$ | 0.33 | -0.27  | $\pm$ | 0.34 | -0.28  | $\pm$ | 0.41 |
| PFHpS                                                                                             | 1.11  | $\pm$ | 0.51 | 0.38  | $\pm$ | 0.28 | 0.10   | $\pm$ | 0.54 | 0.58   | $\pm$ | 0.60 |
| PFOS                                                                                              | 1.59  | $\pm$ | 0.43 | 1.08  | $\pm$ | 0.22 | 0.39   | $\pm$ | 0.38 | 0.88   | $\pm$ | 0.43 |
| 6:2 FTCA                                                                                          | 0.85  | $\pm$ | 0.30 | 0.65  | $\pm$ | 0.26 | -0.38  | $\pm$ | 0.35 | -1.08  | $\pm$ | 0.45 |
| 8:2 FTCA                                                                                          | N/A   | $\pm$ | N/A  | 1.82  | $\pm$ | 0.13 | 0.27   | $\pm$ | 0.30 | 0.11   | $\pm$ | 0.47 |
| 10:2 FTCA                                                                                         | N/A   | $\pm$ | N/A  | N/A   | $\pm$ | N/A  | 1.21   | $\pm$ | 0.59 | N/A    | $\pm$ | 0.67 |
| 3:3 FTCA                                                                                          | 0.53  | $\pm$ | 0.58 | 0.68  | $\pm$ | 0.43 | -0.98  | $\pm$ | 0.39 | 0.10   | $\pm$ | 0.65 |
| 5:3 FTCA                                                                                          | 0.85  | $\pm$ | 0.36 | 0.66  | $\pm$ | 0.23 | -0.24  | $\pm$ | 0.38 | -0.93  | $\pm$ | 0.34 |
| 7:3 FTCA                                                                                          | N/A   | $\pm$ | N/A  | 2.10  | $\pm$ | 0.11 | 0.74   | $\pm$ | 0.24 | 0.40   | $\pm$ | 0.47 |
| 5:1:2 FTUCA                                                                                       | 0.49  | $\pm$ | 0.50 | -0.75 | $\pm$ | 0.50 | -0.94  | $\pm$ | 0.36 | -0.12  | $\pm$ | 0.35 |
| 7:1:2 FTUCA                                                                                       | 1.79  | $\pm$ | 0.28 | 1.31  | $\pm$ | 0.11 | 0.24   | $\pm$ | 0.33 | 0.46   | $\pm$ | 0.54 |
| 4:2 FTS                                                                                           | 0.30  | $\pm$ | 0.66 | N/A   | $\pm$ | N/A  | -0.23  | $\pm$ | 0.69 | 0.02   | $\pm$ | 0.64 |
| 6:2 FTS                                                                                           | 0.45  | $\pm$ | 0.47 | 0.69  | $\pm$ | 0.34 | -0.09  | $\pm$ | 0.60 | 0.14   | $\pm$ | 0.52 |
| 8:2 FTS                                                                                           | 1.80  | $\pm$ | 0.31 | 1.51  | $\pm$ | 0.18 | 0.32   | $\pm$ | 0.42 | 0.67   | $\pm$ | 0.45 |
| FBSA                                                                                              | 0.52  | $\pm$ | 0.59 | 0.27  | $\pm$ | 0.66 | N/A    | $\pm$ | N/A  | -0.33  | $\pm$ | 0.43 |
| FBSE                                                                                              | 0.05  | $\pm$ | 0.61 | 0.32  | $\pm$ | 0.66 | -0.20  | $\pm$ | 0.37 | -0.17  | $\pm$ | 0.42 |
| MeFBSE                                                                                            | 0.67  | $\pm$ | 0.49 | -0.20 | $\pm$ | 0.53 | -0.94  | $\pm$ | 0.36 | -0.24  | $\pm$ | 0.46 |
| N-MeFOSAA                                                                                         | N/A   | $\pm$ | N/A  | 2.66  | $\pm$ | 0.11 | 1.07   | $\pm$ | 0.15 | 0.65   | $\pm$ | 0.49 |
| N-EtFOSAA                                                                                         | N/A   | $\pm$ | N/A  | 2.47  | $\pm$ | 0.10 | 1.10   | $\pm$ | 0.19 | 0.77   | $\pm$ | 0.47 |
| 5:3 FTB                                                                                           | 0.03  | $\pm$ | 0.52 | -0.07 | $\pm$ | 0.20 | -1.01  | $\pm$ | 0.35 | -0.94  | $\pm$ | 0.34 |
| 5:1:2 FTB                                                                                         | 0.23  | $\pm$ | 0.41 | -0.46 | $\pm$ | 0.27 | -0.33  | $\pm$ | 0.33 | -0.53  | $\pm$ | 0.33 |
| AmPr-FHxSA                                                                                        | -1.19 | $\pm$ | 0.32 | 0.89  | $\pm$ | 0.61 | 1.54   | $\pm$ | 0.59 | -1.09  | $\pm$ | 0.42 |
| TAmPr-FHxSA                                                                                       | -0.37 | $\pm$ | 0.42 | -0.10 | $\pm$ | 0.66 | 0.54   | $\pm$ | 0.66 | 0.25   | $\pm$ | 0.62 |
| 6:2 FTAB                                                                                          | 0.43  | $\pm$ | 0.25 | 0.71  | $\pm$ | 0.36 | 0.53   | $\pm$ | 0.28 | -0.15  | $\pm$ | 0.45 |

**Table S10.** log  $K_d$  values reported as average  $\pm$  standard deviation for each PFAS on goethite.

| log $K_d$ values (units as $L\ g^{-1}$ prior to log transformation) for each PFAS on goethite |       |       |      |       |       |      |        |       |      |        |       |      |
|-----------------------------------------------------------------------------------------------|-------|-------|------|-------|-------|------|--------|-------|------|--------|-------|------|
|                                                                                               | pH 4  |       |      | pH 5  |       |      | pH 6.3 |       |      | pH 8.3 |       |      |
| PFBA                                                                                          | -2.69 | $\pm$ | 0.55 | -2.92 | $\pm$ | 0.67 | -2.93  | $\pm$ | 0.64 | -2.50  | $\pm$ | 0.55 |
| PFPeA                                                                                         | -2.69 | $\pm$ | 0.34 | -2.26 | $\pm$ | 0.47 | -2.19  | $\pm$ | 0.25 | -1.90  | $\pm$ | 0.39 |
| PFHxA                                                                                         | -1.34 | $\pm$ | 0.30 | -1.27 | $\pm$ | 0.30 | -1.32  | $\pm$ | 0.34 | -2.59  | $\pm$ | 0.14 |
| PFHpA                                                                                         | -0.95 | $\pm$ | 0.35 | -1.19 | $\pm$ | 0.25 | -1.42  | $\pm$ | 0.34 | -1.93  | $\pm$ | 0.67 |
| PFOA                                                                                          | -0.46 | $\pm$ | 0.31 | -0.69 | $\pm$ | 0.23 | -0.96  | $\pm$ | 0.29 | -2.20  | $\pm$ | 0.27 |
| PFNA                                                                                          | -0.45 | $\pm$ | 0.31 | -0.55 | $\pm$ | 0.26 | -0.68  | $\pm$ | 0.24 | -1.50  | $\pm$ | 0.36 |
| PFDA                                                                                          | -0.13 | $\pm$ | 0.28 | -0.36 | $\pm$ | 0.27 | -0.51  | $\pm$ | 0.32 | N/A    | $\pm$ | N/A  |
| PFUnA                                                                                         | N/A   | $\pm$ | N/A  | -0.26 | $\pm$ | 0.31 | -0.29  | $\pm$ | 0.32 | N/A    | $\pm$ | N/A  |
| PFBS                                                                                          | N/A   | $\pm$ | N/A  | N/A   | $\pm$ | N/A  | N/A    | $\pm$ | N/A  | -1.27  | $\pm$ | 0.44 |
| PFHxS                                                                                         | -0.59 | $\pm$ | 0.28 | -0.81 | $\pm$ | 0.26 | -1.01  | $\pm$ | 0.33 | -2.11  | $\pm$ | 0.39 |
| PFHpS                                                                                         | -0.26 | $\pm$ | 0.32 | -0.57 | $\pm$ | 0.25 | -0.74  | $\pm$ | 0.28 | -1.56  | $\pm$ | 0.37 |
| PFOS                                                                                          | -0.43 | $\pm$ | 0.35 | -0.58 | $\pm$ | 0.32 | -0.57  | $\pm$ | 0.31 | -1.09  | $\pm$ | 0.40 |
| 6:2 FTCA                                                                                      | -0.65 | $\pm$ | 0.30 | -0.73 | $\pm$ | 0.21 | -0.88  | $\pm$ | 0.29 | -1.36  | $\pm$ | 0.32 |
| 8:2 FTCA                                                                                      | N/A   | $\pm$ | N/A  | -0.24 | $\pm$ | 0.28 | -0.53  | $\pm$ | 0.26 | -0.50  | $\pm$ | 0.32 |
| 3:3 FTCA                                                                                      | N/A   | $\pm$ | N/A  | N/A   | $\pm$ | N/A  | N/A    | $\pm$ | N/A  | -0.72  | $\pm$ | 0.26 |
| 5:3 FTCA                                                                                      | -0.36 | $\pm$ | 0.32 | -0.66 | $\pm$ | 0.18 | -1.16  | $\pm$ | 0.29 | -1.33  | $\pm$ | 0.31 |
| 7:3 FTCA                                                                                      | N/A   | $\pm$ | N/A  | 0.24  | $\pm$ | 0.25 | -0.61  | $\pm$ | 0.31 | -1.46  | $\pm$ | 0.67 |
| 5:1:2 FTUCA                                                                                   | -0.79 | $\pm$ | 0.25 | -1.05 | $\pm$ | 0.21 | -1.23  | $\pm$ | 0.28 | -1.44  | $\pm$ | 0.33 |
| 7:1:2 FTUCA                                                                                   | N/A   | $\pm$ | N/A  | -0.32 | $\pm$ | 0.20 | -0.55  | $\pm$ | 0.28 | -0.69  | $\pm$ | 0.36 |
| 4:2 FTS                                                                                       | -2.74 | $\pm$ | 0.55 | N/A   | $\pm$ | N/A  | N/A    | $\pm$ | N/A  | N/A    | $\pm$ | N/A  |
| 8:2 FTS                                                                                       | -0.10 | $\pm$ | 0.21 | -0.61 | $\pm$ | 0.16 | -0.61  | $\pm$ | 0.31 | -0.31  | $\pm$ | 0.37 |
| 10:2 FTS                                                                                      | N/A   | $\pm$ | N/A  | -3.18 | $\pm$ | 0.30 | -3.09  | $\pm$ | 0.81 | N/A    | $\pm$ | N/A  |
| FBSA                                                                                          | -1.55 | $\pm$ | 0.36 | -1.77 | $\pm$ | 0.34 | -1.95  | $\pm$ | 0.57 | -1.84  | $\pm$ | 0.32 |
| FBSE                                                                                          | -1.03 | $\pm$ | 0.33 | -1.10 | $\pm$ | 0.26 | -1.06  | $\pm$ | 0.35 | -1.68  | $\pm$ | 0.40 |
| MeFBSE                                                                                        | -0.64 | $\pm$ | 0.23 | -0.86 | $\pm$ | 0.25 | -1.08  | $\pm$ | 0.31 | -3.09  | $\pm$ | 0.35 |
| N-MeFOSAA                                                                                     | N/A   | $\pm$ | N/A  | N/A   | $\pm$ | N/A  | -0.46  | $\pm$ | 0.41 | -0.24  | $\pm$ | 0.09 |
| N-EtFOSAA                                                                                     | N/A   | $\pm$ | N/A  | N/A   | $\pm$ | N/A  | -0.08  | $\pm$ | 0.33 | N/A    | $\pm$ | N/A  |
| 5:3 FTB                                                                                       | -1.16 | $\pm$ | 0.32 | -0.95 | $\pm$ | 0.23 | -0.73  | $\pm$ | 0.32 | -0.63  | $\pm$ | 0.27 |
| 5:1:2 FTB                                                                                     | -1.15 | $\pm$ | 0.37 | -0.91 | $\pm$ | 0.18 | -1.01  | $\pm$ | 0.29 | -0.84  | $\pm$ | 0.24 |
| AmPr-FHxSA                                                                                    | -0.21 | $\pm$ | 0.16 | -0.14 | $\pm$ | 0.51 | -0.77  | $\pm$ | 0.17 | -3.48  | $\pm$ | 0.35 |
| TAmPr-FHxSA                                                                                   | -0.36 | $\pm$ | 0.20 | -0.04 | $\pm$ | 0.58 | -0.46  | $\pm$ | 0.15 | -1.51  | $\pm$ | 0.32 |
| 6:2 FTAB                                                                                      | -0.85 | $\pm$ | 0.21 | -0.71 | $\pm$ | 0.13 | -0.96  | $\pm$ | 0.08 | -0.85  | $\pm$ | 0.09 |

**Table S11.** log  $K_d$  values reported as average  $\pm$  standard deviation for each PFAS on montmorillonite.

| log $K_d$ values (units as L g <sup>-1</sup> prior to log transformation) for each PFAS on montmorillonite |       |       |      |       |       |      |        |       |      |        |       |      |
|------------------------------------------------------------------------------------------------------------|-------|-------|------|-------|-------|------|--------|-------|------|--------|-------|------|
|                                                                                                            | pH 4  |       |      | pH 5  |       |      | pH 6.3 |       |      | pH 8.3 |       |      |
| PFBA                                                                                                       | -2.79 | $\pm$ | 0.18 | -2.34 | $\pm$ | 0.51 | -1.68  | $\pm$ | 0.50 | N/A    | $\pm$ | 0.48 |
| PFPeA                                                                                                      | -2.25 | $\pm$ | 0.40 | -2.65 | $\pm$ | 0.18 | -2.15  | $\pm$ | 0.26 | -1.20  | $\pm$ | 0.39 |
| PFHxA                                                                                                      | -2.23 | $\pm$ | 0.32 | -1.63 | $\pm$ | 0.36 | -1.50  | $\pm$ | 0.28 | -1.52  | $\pm$ | 0.39 |
| PFHpA                                                                                                      | -1.95 | $\pm$ | 0.20 | -1.45 | $\pm$ | 0.44 | -1.55  | $\pm$ | 0.47 | -2.19  | $\pm$ | 0.56 |
| PFOA                                                                                                       | -2.04 | $\pm$ | 0.45 | -1.10 | $\pm$ | 0.31 | -1.03  | $\pm$ | 0.37 | -1.09  | $\pm$ | 0.40 |
| PFNA                                                                                                       | -1.20 | $\pm$ | 0.35 | -0.97 | $\pm$ | 0.32 | -0.60  | $\pm$ | 0.30 | -0.88  | $\pm$ | 0.56 |
| PFDA                                                                                                       | -0.68 | $\pm$ | 0.35 | -0.86 | $\pm$ | 0.38 | -0.53  | $\pm$ | 0.22 | -0.73  | $\pm$ | 0.64 |
| PFUnA                                                                                                      | -0.13 | $\pm$ | 0.38 | N/A   | $\pm$ | N/A  | -0.57  | $\pm$ | 0.23 | -0.94  | $\pm$ | 0.46 |
| PFBS                                                                                                       | -2.91 | $\pm$ | 0.35 | N/A   | $\pm$ | N/A  | N/A    | $\pm$ | N/A  | -1.31  | $\pm$ | 0.22 |
| PFHxS                                                                                                      | -0.73 | $\pm$ | 0.32 | -0.92 | $\pm$ | 0.24 | -0.87  | $\pm$ | 0.26 | -0.79  | $\pm$ | 0.38 |
| PFHpS                                                                                                      | -0.07 | $\pm$ | 0.32 | -0.57 | $\pm$ | 0.19 | -0.45  | $\pm$ | 0.20 | -0.63  | $\pm$ | 0.36 |
| PFOS                                                                                                       | 0.71  | $\pm$ | 0.37 | -0.30 | $\pm$ | 0.25 | -0.23  | $\pm$ | 0.15 | -0.21  | $\pm$ | 0.32 |
| PFDS                                                                                                       | 0.40  | $\pm$ | 0.47 | -0.14 | $\pm$ | 0.11 | 0.02   | $\pm$ | 0.13 | 0.26   | $\pm$ | 0.36 |
| 6:2 FTCA                                                                                                   | 0.15  | $\pm$ | 0.29 | -0.50 | $\pm$ | 0.29 | 0.97   | $\pm$ | 0.44 | -0.10  | $\pm$ | 0.67 |
| 8:2 FTCA                                                                                                   | -0.67 | $\pm$ | 0.18 | -0.60 | $\pm$ | 0.22 | 0.93   | $\pm$ | 0.50 | -0.09  | $\pm$ | 0.65 |
| 3:3 FTCA                                                                                                   | N/A   | $\pm$ | 0.35 | -0.25 | $\pm$ | 0.40 | -0.20  | $\pm$ | 0.40 | -0.22  | $\pm$ | 0.40 |
| 5:3 FTCA                                                                                                   | -0.92 | $\pm$ | 0.10 | -0.39 | $\pm$ | 0.38 | -0.71  | $\pm$ | 0.43 | -1.53  | $\pm$ | 0.48 |
| 7:3 FTCA                                                                                                   | 0.35  | $\pm$ | 0.15 | -0.55 | $\pm$ | 0.16 | -0.60  | $\pm$ | 0.42 | -1.21  | $\pm$ | 0.51 |
| 5:1:2 FTUCA                                                                                                | -1.77 | $\pm$ | 0.08 | -0.76 | $\pm$ | 0.32 | -0.50  | $\pm$ | 0.42 | -0.68  | $\pm$ | 0.33 |
| 7:1:2 FTUCA                                                                                                | -1.32 | $\pm$ | 0.29 | -0.95 | $\pm$ | 0.37 | -0.35  | $\pm$ | 0.30 | -0.71  | $\pm$ | 0.48 |
| 4:2 FTS                                                                                                    | N/A   | $\pm$ | N/A  | N/A   | $\pm$ | N/A  | -1.11  | $\pm$ | 0.47 | -2.87  | $\pm$ | 0.25 |
| 6:2 FTS                                                                                                    | N/A   | $\pm$ | N/A  | -2.43 | $\pm$ | 0.41 | N/A    | $\pm$ | N/A  | -2.49  | $\pm$ | 0.48 |
| 8:2 FTS                                                                                                    | -0.50 | $\pm$ | 0.32 | -1.31 | $\pm$ | 0.90 | -1.10  | $\pm$ | 0.46 | -1.13  | $\pm$ | 0.54 |
| FBSA                                                                                                       | -2.08 | $\pm$ | 0.55 | -1.26 | $\pm$ | 0.45 | -1.22  | $\pm$ | 0.42 | -1.27  | $\pm$ | 0.41 |
| FBSE                                                                                                       | -1.68 | $\pm$ | 0.16 | -0.85 | $\pm$ | 0.37 | -0.76  | $\pm$ | 0.38 | -0.90  | $\pm$ | 0.29 |
| MeFBSE                                                                                                     | -2.16 | $\pm$ | 0.18 | -1.86 | $\pm$ | 0.41 | -1.17  | $\pm$ | 0.37 | -1.58  | $\pm$ | 0.35 |
| N-MeFOSAA                                                                                                  | -0.86 | $\pm$ | 0.13 | -0.60 | $\pm$ | 0.42 | N/A    | $\pm$ | N/A  | N/A    | $\pm$ | 0.44 |
| 5:3 FTB                                                                                                    | 0.94  | $\pm$ | 0.24 | 0.20  | $\pm$ | 0.12 | -0.48  | $\pm$ | 0.08 | -0.65  | $\pm$ | 0.10 |
| 5:1:2 FTB                                                                                                  | 0.91  | $\pm$ | 0.35 | 0.01  | $\pm$ | 0.29 | -0.60  | $\pm$ | 0.12 | -0.85  | $\pm$ | 0.15 |
| AmPr-FHxSA                                                                                                 | 0.11  | $\pm$ | 0.38 | -0.16 | $\pm$ | 0.15 | -2.41  | $\pm$ | 0.10 | -0.69  | $\pm$ | 0.38 |
| TAmPr-FHxSA                                                                                                | 0.26  | $\pm$ | 0.43 | 1.01  | $\pm$ | 0.39 | 0.75   | $\pm$ | 0.41 | 0.78   | $\pm$ | 0.19 |
| 6:2 FTAB                                                                                                   | -0.34 | $\pm$ | 0.41 | 1.01  | $\pm$ | 0.27 | 0.72   | $\pm$ | 0.14 | 0.55   | $\pm$ | 0.27 |

**Table S12.** log  $K_d$  values reported as average  $\pm$  standard deviation for each PFAS on kaolinite.

| log $K_d$ values (units as L g <sup>-1</sup> prior to log transformation) for each PFAS on kaolinite |       |       |      |       |       |      |        |       |      |        |       |      |
|------------------------------------------------------------------------------------------------------|-------|-------|------|-------|-------|------|--------|-------|------|--------|-------|------|
|                                                                                                      | pH 4  |       |      | pH 5  |       |      | pH 6.3 |       |      | pH 8.3 |       |      |
| PFBA                                                                                                 | -2.26 | $\pm$ | 0.46 | -2.99 | $\pm$ | 0.63 | -1.68  | $\pm$ | 0.56 | -2.39  | $\pm$ | 0.46 |
| PFPeA                                                                                                | -2.07 | $\pm$ | 0.32 | -1.73 | $\pm$ | 0.27 | -2.01  | $\pm$ | 0.32 | -1.67  | $\pm$ | 0.20 |
| PFHxA                                                                                                | -2.20 | $\pm$ | 0.27 | -2.12 | $\pm$ | 0.34 | -2.39  | $\pm$ | 0.43 | -1.69  | $\pm$ | 0.13 |
| PFHpA                                                                                                | -1.71 | $\pm$ | 0.41 | -1.67 | $\pm$ | 0.32 | -2.57  | $\pm$ | 0.46 | -1.66  | $\pm$ | 0.16 |
| PFOA                                                                                                 | -1.06 | $\pm$ | 0.33 | -0.96 | $\pm$ | 0.23 | -2.46  | $\pm$ | 0.40 | -1.77  | $\pm$ | 0.52 |
| PFNA                                                                                                 | -0.71 | $\pm$ | 0.33 | -0.63 | $\pm$ | 0.26 | -1.75  | $\pm$ | 0.27 | -1.62  | $\pm$ | 0.58 |
| PFDA                                                                                                 | -0.10 | $\pm$ | 0.40 | -0.19 | $\pm$ | 0.55 | -1.19  | $\pm$ | 0.31 | -1.63  | $\pm$ | 0.73 |
| PFBS                                                                                                 | -2.10 | $\pm$ | 0.44 | -1.48 | $\pm$ | 0.50 | -2.72  | $\pm$ | 0.36 | -1.64  | $\pm$ | 0.35 |
| PFHxS                                                                                                | -1.02 | $\pm$ | 0.38 | -1.33 | $\pm$ | 0.24 | -1.51  | $\pm$ | 0.32 | -1.71  | $\pm$ | 0.36 |
| PFHpS                                                                                                | -0.81 | $\pm$ | 0.30 | -0.61 | $\pm$ | 0.26 | -0.73  | $\pm$ | 0.31 | -1.31  | $\pm$ | 0.40 |
| PFOS                                                                                                 | -0.37 | $\pm$ | 0.34 | -0.64 | $\pm$ | 0.28 | -0.11  | $\pm$ | 0.36 | -1.30  | $\pm$ | 0.52 |
| 6:2 FTCA                                                                                             | 0.27  | $\pm$ | 0.23 | 0.83  | $\pm$ | 0.35 | 0.21   | $\pm$ | 0.34 | -1.37  | $\pm$ | 0.33 |
| 8:2 FTCA                                                                                             | N/A   | $\pm$ | N/A  | -0.36 | $\pm$ | 0.34 | -0.76  | $\pm$ | 0.13 | -1.32  | $\pm$ | 0.20 |
| 10:2 FTCA                                                                                            | N/A   | $\pm$ | N/A  | 0.85  | $\pm$ | 0.51 | N/A    | $\pm$ | N/A  | N/A    | $\pm$ | N/A  |
| 3:3 FTCA                                                                                             | N/A   | $\pm$ | N/A  | -2.06 | $\pm$ | 0.41 | N/A    | $\pm$ | N/A  | -1.24  | $\pm$ | 0.75 |
| 5:3 FTCA                                                                                             | -1.40 | $\pm$ | 0.28 | -1.53 | $\pm$ | 0.26 | -2.09  | $\pm$ | 0.37 | -1.73  | $\pm$ | 0.28 |
| 7:3 FTCA                                                                                             | N/A   | $\pm$ | N/A  | -1.14 | $\pm$ | 0.24 | -1.87  | $\pm$ | 0.94 | -1.63  | $\pm$ | 0.50 |
| 5:1:2 FTUCA                                                                                          | -1.42 | $\pm$ | 0.33 | -1.86 | $\pm$ | 0.21 | -2.55  | $\pm$ | 0.18 | -1.97  | $\pm$ | 0.22 |
| 7:1:2 FTUCA                                                                                          | -1.21 | $\pm$ | 0.13 | -1.36 | $\pm$ | 0.12 | -2.65  | $\pm$ | 0.31 | -1.40  | $\pm$ | 0.09 |
| 4:2 FTS                                                                                              | -2.09 | $\pm$ | 0.57 | -2.98 | $\pm$ | 0.63 | N/A    | $\pm$ | N/A  | -1.37  | $\pm$ | 0.95 |
| 6:2 FTS                                                                                              | -1.39 | $\pm$ | 0.46 | -1.29 | $\pm$ | 0.63 | N/A    | $\pm$ | N/A  | -2.95  | $\pm$ | 0.71 |
| 8:2 FTS                                                                                              | N/A   | $\pm$ | N/A  | -1.08 | $\pm$ | 0.38 | -0.60  | $\pm$ | 0.49 | -1.91  | $\pm$ | 0.24 |
| FBSA                                                                                                 | -2.93 | $\pm$ | 0.32 | -2.36 | $\pm$ | 0.54 | -1.91  | $\pm$ | 0.28 | -2.29  | $\pm$ | 0.50 |
| FBSE                                                                                                 | -2.09 | $\pm$ | 0.50 | -2.34 | $\pm$ | 0.39 | -2.32  | $\pm$ | 0.32 | -2.26  | $\pm$ | 0.56 |
| MeFBSE                                                                                               | -2.26 | $\pm$ | 0.29 | -2.93 | $\pm$ | 0.31 | -2.07  | $\pm$ | 0.42 | -2.39  | $\pm$ | 0.58 |
| N-MeFOSAA                                                                                            | N/A   | $\pm$ | N/A  | -0.85 | $\pm$ | 0.17 | -0.95  | $\pm$ | 0.37 | N/A    | $\pm$ | N/A  |
| 5:3 FTB                                                                                              | -1.00 | $\pm$ | 0.37 | -1.39 | $\pm$ | 0.32 | -3.04  | $\pm$ | 0.32 | -1.58  | $\pm$ | 0.26 |
| 5:1:2 FTB                                                                                            | -0.79 | $\pm$ | 0.52 | -1.26 | $\pm$ | 0.36 | -3.04  | $\pm$ | 0.34 | -1.49  | $\pm$ | 0.20 |
| AmPr-FHxSA                                                                                           | -0.27 | $\pm$ | 0.43 | -1.30 | $\pm$ | 0.51 | -0.67  | $\pm$ | 0.34 | -0.45  | $\pm$ | 0.00 |
| TAmPr-FHxSA                                                                                          | -0.47 | $\pm$ | 0.40 | -0.50 | $\pm$ | 0.31 | -0.19  | $\pm$ | 0.35 | N/A    | $\pm$ | N/A  |
| 6:2 FTAB                                                                                             | -0.92 | $\pm$ | 0.36 | -1.24 | $\pm$ | 0.56 | -3.01  | $\pm$ | 0.40 | -0.97  | $\pm$ | 0.72 |

## References

- 1 C. Ching, M. J. Klemes, B. Trang, W. R. Dichtel and D. E. Helbling,  $\beta$ -Cyclodextrin Polymers with Different Cross-Linkers and Ion-Exchange Resins Exhibit Variable Adsorption of Anionic, Zwitterionic, and Nonionic PFASs, *Environ Sci Technol*, 2020, **54**, 12693–12702.
- 2 C. Wu, M. J. Klemes, B. Trang, W. R. Dichtel and D. E. Helbling, Exploring the factors that influence the adsorption of anionic PFAS on conventional and emerging adsorbents in aquatic matrices, *Water Res*, 2020, **182**, 115950.
- 3 Y. Ling, M. J. Klemes, S. Steinschneider, W. R. Dichtel and D. E. Helbling, QSARs to predict adsorption affinity of organic micropollutants for activated carbon and  $\beta$ -cyclodextrin polymer adsorbents, *Water Res*, 2019, **154**, 217–226.
- 4 D. C. Baird, *Experimentation: An Introduction to Measurement Theory and Experiment Design*, Addison-Wesley Professional, NJ, 1994.
- 5 P. Jacob and D. E. Helbling, Rapid and Simultaneous Quantification of Short- and Ultrashort-Chain Perfluoroalkyl Substances in Water and Wastewater, *ACS ES&T Water*, 2023, **3**, 118–128.
